# Supplementary material
Source: Research Square preprint supplement (doi:10.21203/rs.3.rs-9162620/v1)
Supplement: Supplementary file 1 [file 22df97257b366728bd113f00.xlsx]

## Sheet: matrix
Family				Amaranthaceae	Euphorbiaceae	Cyperaceae	Asteraceae	Poaceae	Poaceae	Convolvulaceae	Convolvulaceae	Convolvulaceae	Poaceae	Onagraceae	Poaceae	Polygonaceae	Polygonaceae	Polygonaceae	Poygonaceae	Cyperaceae	Typhaceae	Poaceae
Point	Arm	Month	Year	Althernantera philoxeroides	Caperonia castaneifolia	Cyperus blepharoleptos	Eclipta prostata	Hymenachne amplexicaulis	Hymenachne pernambucensis	Ipomoea cairica	Ipomoea carnea	Ipomoea subrevoluta	Leersia hexandra	Ludwigia leptocarpa	Paspalum repens	Polygonum acuminatum	Polygonum ferrugineum	Polygonum persicaria	Polygonum stelligerum	Rynchospora corymbosa	Typha domingensis	Urochloa arrecta
SJ01	SJ	jul	2022	0	0	0	0	0	1	0	0	0	0	0	0	0	0	0	0	0	0	1
SJ02	SJ	jul	2022	0	1	0	0	0	1	0	0	0	0	0	0	0	0	0	0	0	0	1
SJ03	SJ	jul	2022	0	1	0	0	0	0	0	0	0	0	0	0	0	0	0	0	0	0	1
SJ04	SJ	jul	2022	0	0	0	0	0	0	0	0	0	0	0	0	0	0	0	0	0	0	1
SJ05	SJ	jul	2022	0	0	0	0	0	1	0	0	0	0	0	0	0	0	0	0	0	0	1
SJ06	SJ	jul	2022	0	0	0	0	0	0	0	0	0	0	0	0	0	0	0	0	0	0	1
SJ07	SJ	jul	2022	0	0	0	0	0	1	0	0	0	1	0	0	0	0	0	0	0	0	1
SJ08	SJ	jul	2022	0	0	0	0	0	0	0	0	0	1	0	0	0	0	0	0	0	0	1
SJ09	SJ	jul	2022	0	0	0	0	0	1	0	0	0	0	0	0	0	0	0	0	0	0	1
SJ10	SJ	jul	2022	0	0	0	0	0	1	0	0	0	1	0	0	0	1	0	0	0	0	0
SJ11	SJ	jul	2022	0	0	0	0	0	1	0	0	0	0	0	0	0	0	0	0	0	0	1
SJ12	SJ	jul	2022	0	0	0	0	0	0	0	0	0	0	0	0	0	0	0	0	0	0	1
SJ13	SJ	jul	2022	0	0	0	0	0	1	0	0	0	0	0	0	0	1	0	0	0	0	1
SJ14	SJ	jul	2022	0	0	0	0	0	1	0	0	0	0	0	0	0	1	0	0	0	0	1
SJ15	SJ	jul	2022	0	0	0	0	0	1	0	0	0	0	0	0	0	1	0	0	0	0	0
SJ16	SJ	jul	2022	0	0	0	0	0	1	0	0	0	0	0	0	0	1	0	0	0	0	1
SJ17	SJ	jul	2022	0	0	0	0	0	1	0	0	0	0	0	0	0	1	0	0	0	0	1
SJ18	SJ	jul	2022	0	0	0	0	0	1	0	0	0	0	0	0	0	1	0	0	0	0	1
SJ19	SJ	jul	2022	0	1	0	0	0	1	0	0	0	0	0	0	0	1	0	0	0	0	1
SJ20	SJ	jul	2022	0	0	0	0	0	1	0	0	0	0	0	0	0	0	0	0	0	0	1
SJ21	SJ	jul	2022	0	0	0	0	0	1	0	0	0	0	0	0	0	0	0	0	0	0	1
SJ22	SJ	jul	2022	0	0	0	0	0	1	0	0	0	0	0	0	0	0	0	0	0	0	1
SJ23	SJ	jul	2022	0	0	0	0	0	1	0	0	0	0	0	0	0	1	0	0	0	0	1
SJ24	SJ	jul	2022	0	0	0	0	0	1	0	0	0	0	0	0	0	0	0	0	0	0	1
SJ25	SJ	jul	2022	0	0	0	0	0	1	0	0	0	0	0	0	0	0	0	0	0	0	1
SJ26	SJ	jul	2022	0	0	0	0	0	1	0	0	0	0	0	0	0	0	0	0	0	0	1
SJ27	SJ	jul	2022	0	0	0	0	0	1	0	0	0	0	0	0	0	0	0	0	0	0	1
SJ28	SJ	jul	2022	0	0	0	0	0	1	0	0	0	0	0	0	0	0	0	0	0	0	1
SJ29	SJ	jul	2022	0	0	0	0	0	1	0	0	0	0	0	0	0	0	0	0	0	0	0
SV01	SV	jul	2022	0	0	0	0	0	1	0	0	0	0	0	0	0	1	0	0	0	0	1
SV02	SV	jul	2022	0	0	0	0	0	1	0	0	0	0	0	0	0	1	0	0	0	0	1
SV03	SV	jul	2022	0	1	0	0	0	1	0	0	0	0	0	0	0	0	0	0	0	0	1
SV04	SV	jul	2022	0	0	0	0	0	1	0	0	0	0	0	0	0	0	0	0	0	0	1
SV05	SV	jul	2022	0	0	0	0	0	1	0	0	0	0	0	0	0	1	0	0	0	0	1
SV06	SV	jul	2022	0	0	0	0	0	1	0	0	0	0	0	0	0	1	0	0	0	0	0
SV07	SV	jul	2022	0	0	0	0	0	1	0	0	0	0	0	0	0	1	0	0	0	0	0
SV08	SV	jul	2022	0	0	0	0	0	1	0	0	0	0	0	0	0	1	0	0	0	0	0
SV09	SV	jul	2022	0	0	0	0	0	1	0	0	0	0	0	0	0	1	0	0	0	0	0
SV10	SV	jul	2022	0	0	0	0	0	1	0	0	0	0	0	0	0	1	0	0	0	0	1
SV11	SV	jul	2022	0	0	0	0	0	1	0	0	0	0	0	0	0	1	0	0	0	0	1
SV12	SV	jul	2022	0	0	0	0	0	1	0	0	0	0	0	0	0	1	0	0	0	0	1
SV13	SV	jul	2022	0	0	0	0	0	1	0	0	0	0	0	0	0	1	0	0	0	0	1
SV14	SV	jul	2022	0	0	0	0	0	1	0	0	0	0	0	0	0	1	0	0	0	0	1
SV15	SV	jul	2022	0	0	0	0	0	1	0	0	0	0	0	0	0	1	0	0	0	0	1
SV16	SV	jul	2022	0	0	0	0	0	0	0	0	0	0	0	0	0	1	0	0	0	0	1
SV17	SV	jul	2022	0	0	0	0	0	0	0	0	0	0	0	0	0	1	0	0	0	0	1
SV18	SV	jul	2022	0	0	0	0	0	0	0	0	0	0	0	0	0	1	0	0	0	0	1
SV19	SV	jul	2022	0	0	0	0	0	1	0	0	0	0	0	0	0	1	0	0	0	0	1
SV20	SV	jul	2022	0	0	0	0	0	1	0	0	0	0	0	0	0	1	0	0	0	0	1
SV21	SV	jul	2022	0	0	0	0	0	1	0	0	0	0	0	0	0	1	0	0	0	0	1
SV22	SV	jul	2022	0	0	0	0	0	1	0	0	0	0	0	0	0	1	0	0	0	0	1
SV24	SV	jul	2022	0	0	0	0	0	1	0	0	0	0	0	0	0	1	0	0	0	0	1
SV25	SV	jul	2022	0	0	0	0	0	1	0	0	0	0	0	0	0	1	0	0	0	0	1
SV26	SV	jul	2022	0	0	0	0	0	1	0	0	0	0	0	0	0	0	0	0	0	0	1
SV27	SV	jul	2022	0	0	0	0	0	1	0	0	0	0	0	0	0	0	0	0	0	0	1
SV29	SV	jul	2022	0	0	0	0	0	1	0	0	0	0	0	0	0	0	0	0	0	0	1
SV30	SV	jul	2022	0	0	0	0	0	1	0	0	0	0	0	0	0	0	0	0	0	0	1
AG01	AG	jul	2022	0	0	1	0	0	0	0	0	0	0	0	0	0	1	0	0	0	0	1
AG02	AG	jul	2022	0	1	1	0	0	0	0	0	0	0	0	1	0	1	0	0	0	0	1
AG03	AG	jul	2022	0	0	1	0	0	0	0	0	0	0	0	0	0	1	0	0	0	0	1
AG04	AG	jul	2022	0	0	1	0	0	0	0	0	0	0	0	0	0	1	0	0	0	0	1
AG05	AG	jul	2022	0	0	1	0	0	0	0	0	0	0	0	0	0	1	0	0	0	0	1
AG06	AG	jul	2022	0	0	1	0	0	0	0	0	0	0	0	0	0	0	0	0	0	0	1
AG07	AG	jul	2022	0	0	1	0	0	0	0	0	0	0	0	1	0	1	0	0	0	0	1
AG08	AG	jul	2022	0	0	1	0	0	0	0	0	0	0	0	1	0	1	0	0	0	0	1
AG09	AG	jul	2022	0	0	1	0	0	0	0	0	0	0	0	0	0	1	0	0	0	0	1
AG10	AG	jul	2022	0	0	0	0	0	0	0	0	0	0	0	1	0	1	0	0	0	0	1
AG11	AG	jul	2022	0	0	0	0	0	0	0	0	0	0	0	0	0	1	0	0	0	0	1
AG12	AG	jul	2022	0	0	1	0	0	0	0	0	0	0	0	0	0	1	0	0	0	0	1
AG13	AG	jul	2022	0	0	0	0	0	0	0	0	0	0	0	0	0	1	0	0	0	0	0
AG14	AG	jul	2022	0	0	1	0	0	0	0	0	0	0	0	1	0	1	0	0	0	0	1
AG15	AG	jul	2022	0	0	0	0	0	0	0	0	0	0	0	1	0	1	0	0	0	0	1
AG16	AG	jul	2022	0	0	0	0	0	0	0	0	0	0	0	0	0	1	0	0	0	0	1
AG17	AG	jul	2022	0	0	1	0	0	0	0	0	0	0	0	1	0	1	0	0	0	0	1
AG18	AG	jul	2022	0	0	1	0	0	0	0	0	0	0	0	1	0	1	0	0	0	0	1
AG19	AG	jul	2022	0	0	1	0	0	0	0	0	0	0	0	0	0	1	0	0	0	0	1
AG20	AG	jul	2022	0	0	1	0	0	0	0	0	0	0	0	1	0	1	0	0	0	0	1
AG21	AG	jul	2022	0	0	1	0	0	0	0	0	0	0	0	1	0	1	0	0	0	0	1
AG22	AG	jul	2022	0	0	1	0	0	0	0	0	0	0	0	1	0	1	0	0	0	0	1
AG23	AG	jul	2022	0	0	1	0	0	0	0	0	0	0	0	0	0	1	0	0	0	0	1
AG24	AG	jul	2022	0	0	1	0	0	0	0	0	0	0	0	0	0	1	0	0	0	0	1
AG25	AG	jul	2022	0	0	1	0	0	0	0	0	0	0	0	0	0	1	0	0	0	0	1
AG26	AG	jul	2022	0	0	1	0	0	0	0	0	0	0	0	0	0	1	0	0	0	0	1
SFV01	SFV	jul	2022	0	0	1	0	0	0	0	0	0	0	0	1	0	1	0	0	0	0	1
SFV02	SFV	jul	2022	0	0	1	0	0	0	0	0	0	0	0	1	0	1	0	0	0	0	1
SFV03	SFV	jul	2022	1	0	1	0	0	0	0	0	0	0	0	1	0	1	0	0	0	0	1
SFV04	SFV	jul	2022	1	0	1	0	0	0	0	0	0	0	0	1	0	1	0	0	0	0	1
SFV05	SFV	jul	2022	0	0	0	0	0	0	0	0	0	0	0	1	0	1	0	0	0	0	1
SFV06	SFV	jul	2022	0	0	1	0	0	0	0	0	0	0	0	1	0	1	0	0	0	0	1
SFV07	SFV	jul	2022	0	0	1	0	0	0	0	0	0	0	0	1	0	1	0	0	0	0	1
SFV08	SFV	jul	2022	0	0	0	0	0	0	0	0	0	0	0	1	0	0	0	0	0	0	1
SFV09	SFV	jul	2022	0	0	1	0	0	0	0	0	0	0	0	0	0	0	0	0	0	0	1
SFV10	SFV	jul	2022	0	0	0	0	0	0	0	0	0	0	0	0	0	0	0	0	0	0	1
SFV11	SFV	jul	2022	0	0	0	0	0	0	0	0	0	0	0	0	0	0	0	0	0	0	1
SFV12	SFV	jul	2022	0	0	1	0	0	0	0	0	0	0	0	1	0	0	0	0	0	0	1
SFV13	SFV	jul	2022	0	0	0	0	0	0	0	0	0	0	0	0	0	1	0	0	0	0	1
SFV14	SFV	jul	2022	0	0	0	0	0	0	0	0	0	0	0	1	0	0	0	0	0	0	1
SFV15	SFV	jul	2022	0	0	1	0	0	0	0	0	0	0	0	1	0	1	0	0	0	0	1
SFV16	SFV	jul	2022	1	0	0	0	0	0	0	0	0	0	0	1	0	1	0	0	0	0	1
SFV17	SFV	jul	2022	1	1	1	0	0	0	0	0	0	0	0	0	0	1	0	0	0	0	1
SFV18	SFV	jul	2022	0	0	0	0	0	1	0	0	0	0	0	1	0	1	0	0	0	0	1
SFV19	SFV	jul	2022	0	0	1	0	0	0	0	0	0	0	0	1	0	1	0	0	0	0	1
SFV20	SFV	jul	2022	0	0	0	0	0	0	0	0	0	0	0	1	0	1	0	0	0	0	1
SFV21	SFV	jul	2022	1	0	1	0	0	0	0	0	0	0	0	1	0	1	0	0	0	0	1
SFV22	SFV	jul	2022	1	0	1	0	0	0	0	0	0	0	0	1	0	1	0	0	0	0	1
SFV23	SFV	jul	2022	1	0	1	0	0	0	0	0	0	0	0	0	0	1	0	0	0	0	1
SFV24	SFV	jul	2022	1	0	1	0	0	0	0	0	0	0	0	1	0	1	0	0	0	0	0
SFV25	SFV	jul	2022	0	0	1	0	0	0	0	0	0	0	0	1	0	1	0	0	0	0	1
SFV26	SFV	jul	2022	1	1	1	0	0	0	0	0	0	0	0	1	0	1	0	0	0	0	1
SFV27	SFV	jul	2022	0	0	1	0	0	1	0	0	0	0	0	1	0	0	0	0	0	0	1
SFV28	SFV	jul	2022	0	1	1	0	0	0	0	0	0	0	0	1	0	1	0	0	0	0	1
SFV29	SFV	jul	2022	1	0	1	0	0	0	0	0	0	0	0	1	0	0	0	0	0	0	1
SFV30	SFV	jul	2022	1	0	1	0	0	1	0	0	0	0	0	0	0	1	0	0	0	0	1
RP01	RP	jul	2022	1	0	0	0	0	0	0	0	0	0	0	0	0	1	0	0	0	0	1
RP02	RP	jul	2022	0	1	0	0	0	0	0	0	0	0	0	1	0	0	0	0	0	0	0
RP03	RP	jul	2022	0	0	0	0	0	1	0	0	0	0	0	0	0	0	0	0	0	0	0
RP04	RP	jul	2022	0	0	0	0	0	1	0	0	0	0	0	0	0	1	0	0	0	0	0
RP05	RP	jul	2022	0	0	0	0	0	0	0	0	0	0	0	0	0	1	0	0	0	0	0
RP06	RP	jul	2022	1	0	0	0	0	0	0	0	0	0	0	0	0	0	0	0	0	0	0
RP07	RP	jul	2022	1	1	0	0	0	1	0	0	0	0	0	0	0	0	0	0	0	0	1
RP08	RP	jul	2022	0	0	0	0	0	1	0	0	0	1	0	0	0	0	0	0	0	0	1
RP09	RP	jul	2022	1	0	0	0	0	1	0	0	0	0	0	0	0	0	0	0	0	0	1
RP10	RP	jul	2022	1	0	0	0	0	1	0	0	0	0	0	0	1	1	0	0	0	0	1
RP11	RP	jul	2022	1	0	0	0	0	0	0	0	0	0	0	0	0	1	0	0	0	0	1
RP12	RP	jul	2022	0	0	0	0	0	0	0	0	0	0	0	0	0	1	0	0	0	0	1
RP13	RP	jul	2022	0	0	0	0	0	1	0	0	0	0	0	0	0	0	0	0	0	0	1
RP14	RP	jul	2022	0	0	0	0	0	0	0	0	0	0	0	0	0	1	0	0	0	0	1
RP15	RP	jul	2022	0	0	0	0	0	1	0	0	0	0	0	0	0	1	0	0	0	0	1
RP16	RP	jul	2022	0	0	0	0	0	1	0	0	0	0	0	0	0	1	0	0	0	0	1
RP17	RP	jul	2022	1	0	0	0	0	0	0	0	0	0	0	0	0	0	0	0	0	0	1
RP18	RP	jul	2022	0	0	0	0	0	1	0	0	0	0	0	0	0	1	0	0	0	0	1
RP19	RP	jul	2022	0	0	0	0	0	1	0	0	0	0	0	0	0	0	0	0	0	0	1
RP20	RP	jul	2022	0	0	0	0	0	0	0	0	0	0	0	0	0	0	0	0	0	0	0
RP21	RP	jul	2022	0	0	0	0	0	1	0	0	0	0	0	0	0	0	0	0	0	0	1
RP22	RP	jul	2022	0	0	0	0	0	1	0	0	0	0	0	0	0	0	0	0	0	0	1
RP23	RP	jul	2022	0	0	0	0	0	0	0	0	0	0	0	0	0	0	0	0	0	0	1
RP24	RP	jul	2022	0	0	0	0	0	0	0	0	0	0	0	0	0	0	0	0	0	0	1
RP25	RP	jul	2022	0	0	0	0	0	0	0	0	0	0	0	0	0	0	0	0	0	0	1
RP26	RP	jul	2022	0	0	0	0	0	1	0	0	0	0	0	0	0	0	0	0	0	0	1
RP27	RP	jul	2022	0	0	0	0	0	0	0	0	0	0	0	0	0	1	0	0	0	0	1
RP28	RP	jul	2022	0	0	0	0	0	1	0	0	0	0	0	0	0	1	0	0	0	0	1
PC01	PC	jul	2022	0	0	0	0	0	0	0	0	0	0	0	0	0	0	0	0	0	0	1
PC02	PC	jul	2022	0	0	0	0	0	0	0	0	0	0	0	0	1	1	0	0	0	0	1
PC03	PC	jul	2022	0	0	0	0	0	1	0	0	0	0	0	0	0	0	0	0	0	0	1
PC04	PC	jul	2022	0	0	0	0	0	1	0	0	0	0	0	0	0	0	0	0	0	0	1
PC05	PC	jul	2022	0	0	0	0	0	1	0	0	0	0	0	0	0	0	0	0	0	0	1
PC06	PC	jul	2022	0	0	0	0	0	0	0	0	0	0	0	0	0	1	0	0	0	0	1
PC07	PC	jul	2022	0	0	0	0	0	0	0	0	0	0	0	0	0	0	0	0	0	0	1
PC08	PC	jul	2022	1	0	0	0	0	0	0	0	0	0	0	0	0	0	0	0	0	0	1
PC09	PC	jul	2022	0	0	0	0	0	0	0	0	0	0	0	0	0	1	0	0	0	0	1
PC10	PC	jul	2022	0	0	0	0	0	0	0	0	0	0	0	0	0	1	0	0	0	0	1
PC11	PC	jul	2022	0	0	0	0	0	0	0	0	0	0	0	0	0	0	0	0	0	0	1
PC12	PC	jul	2022	1	0	0	0	0	1	0	0	0	0	0	0	0	1	0	0	0	0	1
PC13	PC	jul	2022	0	1	0	0	0	0	0	0	0	0	0	0	0	0	0	0	0	0	1
PC14	PC	jul	2022	0	0	0	0	0	0	0	0	0	0	0	0	0	1	0	0	0	0	1
PC15	PC	jul	2022	0	0	0	0	0	1	0	0	0	0	0	0	0	1	0	0	0	0	0
PC16	PC	jul	2022	0	0	0	0	0	0	0	0	0	0	0	0	0	0	0	0	0	0	1
PC17	PC	jul	2022	0	0	0	0	0	0	0	0	0	0	0	0	0	1	0	0	0	0	1
PC18	PC	jul	2022	0	0	0	0	0	0	0	0	0	0	0	0	0	0	0	0	0	0	1
PC19	PC	jul	2022	0	0	0	0	0	0	0	0	0	0	0	0	0	0	0	0	0	0	1
PC20	PC	jul	2022	0	0	0	0	0	0	0	0	0	0	0	0	0	0	0	0	0	0	1
PC21	PC	jul	2022	0	0	0	0	0	0	0	0	0	0	0	0	0	1	0	0	0	0	1
PC22	PC	jul	2022	0	0	0	0	0	0	0	0	0	0	0	0	0	1	0	0	0	0	0
PC23	PC	jul	2022	0	0	0	0	0	1	0	0	0	0	0	0	0	0	0	0	0	0	1
PC24	PC	jul	2022	0	0	0	0	0	1	0	0	0	0	0	0	0	0	0	0	0	0	0
PC25	PC	jul	2022	0	0	0	0	0	0	0	0	0	0	0	0	0	0	0	0	0	0	0
PC26	PC	jul	2022	0	0	0	0	0	0	0	0	0	0	0	0	0	1	0	0	0	0	0
PC27	PC	jul	2022	0	0	0	0	0	0	0	0	0	0	0	0	0	0	0	0	0	0	0
PC28	PC	jul	2022	0	0	0	0	0	0	0	0	0	0	0	0	0	0	0	0	0	0	0
PC29	PC	jul	2022	0	0	0	0	0	1	0	0	0	0	0	0	0	0	0	0	0	0	0
PC30	PC	jul	2022	0	0	0	0	0	1	0	0	0	0	0	0	0	1	0	0	0	0	1
OC01	OC	jul	2022	0	0	0	0	0	0	0	0	0	0	0	1	0	0	0	0	0	0	1
OC02	OC	jul	2022	0	0	0	0	0	0	0	0	0	0	0	0	0	0	0	0	0	0	1
OC03	OC	jul	2022	0	0	0	0	0	0	0	0	0	0	0	0	0	0	0	0	0	0	0
OC04	OC	jul	2022	0	0	1	0	0	0	0	0	0	0	0	1	0	1	0	0	0	0	1
OC05	OC	jul	2022	1	0	0	0	0	1	0	0	0	0	0	1	0	0	0	0	0	0	1
OC06	OC	jul	2022	0	0	0	0	0	1	0	0	0	0	0	1	0	0	0	0	0	0	1
OC07	OC	jul	2022	0	0	1	0	0	1	0	0	0	0	0	1	0	0	0	0	0	0	1
OC08	OC	jul	2022	0	1	0	0	0	0	0	0	0	0	0	1	0	1	0	0	0	0	1
OC10	OC	jul	2022	1	1	0	0	0	1	0	0	0	0	0	0	0	1	0	0	0	0	1
OC11	OC	jul	2022	1	0	0	0	0	1	0	0	0	0	0	1	0	0	0	0	0	0	1
OC12	OC	jul	2022	0	0	0	0	0	0	0	0	0	0	0	1	0	0	0	0	0	0	0
OC14	OC	jul	2022	0	0	0	0	0	0	0	0	0	0	0	1	0	0	0	0	0	0	1
OC15	OC	jul	2022	1	1	0	0	0	1	0	0	0	0	0	0	0	1	0	0	0	0	1
OC16	OC	jul	2022	0	0	0	0	0	1	0	0	0	0	0	1	0	0	0	0	0	0	1
OC17	OC	jul	2022	1	0	0	0	0	1	0	0	0	0	0	1	0	1	0	0	0	0	1
OC18	OC	jul	2022	0	0	0	0	0	1	0	0	0	0	0	0	0	0	0	0	0	0	1
OC19	OC	jul	2022	0	1	0	0	0	1	0	0	0	0	0	0	0	0	0	0	0	0	1
OC20	OC	jul	2022	0	0	0	0	0	0	0	0	0	0	0	0	0	0	0	0	0	0	1
OC22	OC	jul	2022	0	0	0	0	0	1	0	0	0	0	0	0	0	0	0	0	0	0	1
OC23	OC	jul	2022	1	1	0	0	0	1	0	0	0	0	0	0	0	0	0	0	0	0	1
OC24	OC	jul	2022	1	0	0	0	0	1	0	0	0	0	0	1	0	0	0	0	0	0	0
OC25	OC	jul	2022	0	0	0	0	0	1	0	0	0	0	0	0	0	0	0	0	0	0	1
OC26	OC	jul	2022	1	1	0	0	0	0	0	0	0	0	0	0	0	1	0	0	0	0	1
OC27	OC	jul	2022	0	0	0	0	0	1	0	0	0	0	0	0	0	1	0	0	0	0	0
OC28	OC	jul	2022	1	0	0	0	0	0	0	0	0	1	0	1	0	1	0	0	0	0	0
OC30	OC	jul	2022	0	0	0	0	0	0	0	0	0	0	0	0	0	0	0	0	0	0	0
SFF01	SFF	jul	2022	0	0	0	0	0	0	0	0	0	0	0	0	0	0	0	0	0	0	1
SFF02	SFF	jul	2022	0	0	0	0	0	0	0	0	0	0	0	1	0	1	0	0	0	0	1
SFF03	SFF	jul	2022	0	0	0	0	0	1	0	0	0	0	0	0	0	1	0	0	0	0	1
SFF04	SFF	jul	2022	0	1	0	0	0	1	0	0	0	0	0	0	0	1	0	0	0	0	1
SFF05	SFF	jul	2022	0	1	0	0	0	1	0	0	0	0	0	0	0	1	0	0	0	0	1
SFF06	SFF	jul	2022	0	1	0	0	0	1	0	0	0	0	0	0	0	1	0	0	0	0	1
SFF07	SFF	jul	2022	0	0	0	0	0	1	0	0	0	0	0	0	0	1	0	0	0	0	1
SFF08	SFF	jul	2022	0	1	0	0	0	0	0	0	0	0	0	0	0	1	0	0	0	0	1
SFF09	SFF	jul	2022	0	1	0	0	0	1	0	0	0	0	0	0	0	1	0	0	0	0	1
SFF10	SFF	jul	2022	1	1	1	0	0	1	0	0	0	0	0	0	0	1	0	0	0	0	0
SFF11	SFF	jul	2022	0	0	0	0	0	0	0	0	0	0	0	0	0	1	0	0	0	0	0
SFF13	SFF	jul	2022	0	0	0	0	0	0	0	0	0	0	0	0	0	0	0	0	0	0	1
SFF14	SFF	jul	2022	0	0	1	0	0	1	0	0	0	0	0	0	0	1	0	0	0	0	0
SFF15	SFF	jul	2022	1	0	1	0	0	0	0	0	0	0	0	0	0	1	0	0	0	0	1
SFF16	SFF	jul	2022	1	0	0	0	0	1	0	0	0	0	0	0	0	1	0	0	0	0	1
SFF17	SFF	jul	2022	0	1	1	0	0	1	0	0	0	0	0	0	0	1	0	0	0	0	1
SFF18	SFF	jul	2022	0	0	0	0	0	0	0	0	0	0	0	0	0	1	0	0	0	0	1
SFF19	SFF	jul	2022	1	0	0	0	0	1	0	0	0	0	0	0	0	1	0	0	0	0	1
SFF20	SFF	jul	2022	0	0	0	0	0	1	0	0	0	0	0	0	0	1	0	0	0	0	1
SFF21	SFF	jul	2022	0	0	0	0	0	0	0	0	0	0	0	0	0	1	0	0	0	0	0
SFF22	SFF	jul	2022	1	1	1	0	0	1	0	0	0	0	0	0	0	1	0	0	0	0	1
SFF23	SFF	jul	2022	0	1	0	0	0	1	0	0	0	0	0	0	0	1	0	0	0	0	1
SFF24	SFF	jul	2022	0	1	0	0	0	1	0	0	0	0	0	1	0	1	0	0	0	0	0
SFF25	SFF	jul	2022	0	1	0	0	0	1	0	0	0	0	0	0	0	1	0	0	0	0	0
SFF26	SFF	jul	2022	0	1	0	0	0	1	0	0	0	0	0	1	0	0	0	0	0	0	1
SFF27	SFF	jul	2022	0	1	0	0	0	1	0	0	0	0	0	1	0	1	0	0	0	0	1
SFF28	SFF	jul	2022	0	1	0	0	0	0	0	0	0	0	0	0	0	1	0	0	0	0	0
SFF29	SFF	jul	2022	0	1	0	0	0	1	0	0	0	0	0	1	0	1	0	0	0	0	1
SFF30	SFF	jul	2022	0	0	0	0	0	0	0	0	0	0	0	1	0	1	0	0	0	0	0
SJ01	SJ	nov	2022	0	1	0	1	0	0	0	0	0	0	0	0	0	0	0	0	0	0	0
SJ02	SJ	nov	2022	0	0	0	1	0	0	0	0	0	0	0	0	0	0	0	0	0	0	0
SJ03	SJ	nov	2022	0	0	0	1	0	0	0	0	0	0	0	0	0	0	0	0	0	0	0
SJ04	SJ	nov	2022	0	0	0	1	0	0	0	0	0	0	1	0	0	0	0	0	0	0	0
SJ05	SJ	nov	2022	0	1	0	1	0	0	0	0	0	0	1	0	0	0	0	0	0	0	0
SJ06	SJ	nov	2022	0	1	0	1	0	0	0	0	1	0	1	0	0	0	0	0	0	0	0
SJ07	SJ	nov	2022	0	0	0	1	0	0	0	0	1	0	1	0	0	0	0	0	0	0	0
SJ08	SJ	nov	2022	0	0	0	1	0	0	0	0	0	0	1	0	0	0	0	0	0	0	0
SJ09	SJ	nov	2022	0	1	0	1	0	0	0	0	0	0	1	0	0	0	0	0	0	0	0
SJ10	SJ	nov	2022	0	1	0	1	0	0	0	0	0	0	1	0	0	0	0	0	0	0	0
SJ11	SJ	nov	2022	0	0	0	1	0	0	0	0	0	0	0	0	0	0	0	0	0	0	0
SJ12	SJ	nov	2022	0	0	0	1	0	0	0	0	0	0	0	0	0	0	0	0	0	0	0
SJ13	SJ	nov	2022	0	1	0	1	0	0	0	0	0	0	0	0	0	0	0	0	0	0	0
SJ14	SJ	nov	2022	0	0	0	1	0	1	0	0	0	1	1	0	0	0	0	0	0	0	0
SJ15	SJ	nov	2022	0	1	0	1	0	0	0	0	0	0	0	0	0	0	0	0	0	0	0
SJ16	SJ	nov	2022	0	1	0	1	0	0	0	0	0	0	0	0	0	0	0	0	0	0	0
SJ17	SJ	nov	2022	0	0	0	1	0	0	0	0	0	0	0	0	0	0	0	0	0	0	0
SJ18	SJ	nov	2022	0	1	0	1	0	0	0	0	0	0	1	0	0	0	0	0	0	0	0
SJ19	SJ	nov	2022	0	0	0	1	0	0	0	0	1	0	1	0	0	0	0	0	0	0	0
SJ20	SJ	nov	2022	0	0	0	1	0	0	0	0	0	0	0	0	0	0	0	0	0	0	0
SJ21	SJ	nov	2022	0	0	0	1	0	0	0	0	0	0	1	0	0	0	0	0	0	0	0
SJ22	SJ	nov	2022	0	0	0	1	0	0	0	0	0	0	1	0	0	0	0	0	0	0	0
SJ23	SJ	nov	2022	0	1	0	1	0	0	0	0	0	0	1	0	0	0	0	0	0	0	0
SJ24	SJ	nov	2022	0	0	0	1	0	0	0	0	0	0	0	0	0	0	0	0	0	0	0
SJ25	SJ	nov	2022	0	0	0	1	0	0	0	0	0	0	0	0	0	0	0	0	0	0	0
SJ26	SJ	nov	2022	0	0	0	1	0	0	0	0	0	0	0	0	0	0	0	0	0	0	0
SJ27	SJ	nov	2022	0	1	0	1	0	0	0	0	0	0	1	0	0	0	0	0	0	0	0
SJ28	SJ	nov	2022	0	1	0	1	0	0	0	0	0	0	0	0	0	0	0	0	0	0	0
SJ29	SJ	nov	2022	0	1	0	1	0	0	0	0	0	0	0	0	0	0	0	0	0	0	0
SV01	SV	nov	2022	0	1	0	1	0	0	0	0	0	0	0	0	0	0	0	0	0	0	0
SV02	SV	nov	2022	0	0	0	1	0	0	0	0	0	0	0	0	0	0	0	0	0	0	0
SV03	SV	nov	2022	0	0	0	1	0	0	0	0	0	0	0	0	0	0	0	0	0	0	0
SV04	SV	nov	2022	0	0	0	1	0	0	0	0	0	0	0	0	0	0	0	0	0	0	0
SV05	SV	nov	2022	0	0	0	1	0	0	0	0	0	0	0	0	0	0	0	0	0	0	0
SV06	SV	nov	2022	0	0	0	1	0	0	0	0	0	0	0	0	0	0	0	0	0	0	0
SV07	SV	nov	2022	0	0	0	1	0	0	0	0	0	0	0	0	0	0	0	0	0	0	0
SV08	SV	nov	2022	0	0	0	1	0	0	0	0	1	0	0	0	0	0	0	0	0	0	0
SV09	SV	nov	2022	0	0	0	1	0	0	0	0	0	0	0	0	0	0	0	0	0	0	0
SV10	SV	nov	2022	0	0	0	1	0	0	0	0	0	0	0	0	0	0	0	0	0	0	0
SV11	SV	nov	2022	0	0	0	1	0	0	0	0	0	0	0	0	0	0	0	0	0	0	0
SV12	SV	nov	2022	0	1	0	1	0	0	0	0	0	0	0	0	0	0	0	0	0	0	0
SV13	SV	nov	2022	0	1	0	1	0	0	0	0	0	0	0	0	0	0	0	0	0	0	0
SV14	SV	nov	2022	1	0	0	1	0	0	0	0	0	0	0	0	0	0	0	0	0	0	0
SV15	SV	nov	2022	0	0	0	1	0	0	0	0	0	0	0	0	0	0	0	0	0	0	0
SV16	SV	nov	2022	1	0	0	1	0	0	0	0	0	0	0	0	0	1	0	0	0	0	0
SV17	SV	nov	2022	1	0	0	1	0	0	0	0	0	0	0	0	0	0	0	0	0	0	0
SV18	SV	nov	2022	0	0	0	1	0	0	0	0	0	0	0	0	0	0	0	0	0	0	0
SV19	SV	nov	2022	0	0	0	1	0	0	0	0	0	0	0	0	0	0	0	0	0	0	0
SV20	SV	nov	2022	0	0	0	1	1	0	0	0	0	0	0	0	0	0	0	0	0	0	0
SV21	SV	nov	2022	0	0	0	1	0	0	0	0	0	0	0	0	0	0	0	0	0	0	0
SV22	SV	nov	2022	0	0	0	1	0	0	0	0	0	0	0	0	0	0	0	0	0	0	0
SV24	SV	nov	2022	0	0	0	1	0	0	0	0	0	0	0	0	0	0	0	0	0	0	0
SV25	SV	nov	2022	0	0	0	1	0	0	0	0	0	0	0				0		0	0	0
SV26	SV	nov	2022	0	0	0	1	0	0	0	0	0	0	1	0	0	0	0	0	0	0	0
SV27	SV	nov	2022	0	0	0	1	0	0	0	0	1	0	0	0	0	0	0	0	0	0	0
SV29	SV	nov	2022	0	0	0	1	0	0	0	0	0	0	0	0	0	0	0	0	0	0	0
SV30	SV	nov	2022	0	0	0	1	0	0	0	0	0	0	0	0	0	0	0	0	0	0	0
AG01	AG	nov	2022	0	0	0	1	0	0	0	1	0	0	0	0	1	0	0	0	0	0	0
AG02	AG	nov	2022	1	0	0	1	0	0	1	1	0	0	0	0	1	1	0	0	0	0	0
AG03	AG	nov	2022	0	0	0	1	1	0	1	1	0	0	0	0	1	1	0	0	0	0	0
AG04	AG	nov	2022	0	0	0	1	0	0	1	1	0	0	0	0	1	0	0	0	0	0	0
AG05	AG	nov	2022	0	0	0	1	0	0	0	1	0	0	0	0	1	1	0	0	0	0	0
AG06	AG	nov	2022	0	0	0	1	0	0	1	0	0	0	0	0	1	1	0	0	0	0	0
AG07	AG	nov	2022	0	0	0	1	0	0	1	0	0	0	0	0	1	0	0	0	0	0	0
AG08	AG	nov	2022	0	0	0	1	0	0	1	1	0	0	0	0	1	1	0	0	0	0	0
AG09	AG	nov	2022	0	0	0	1	0	0	1	1	0	0	0	0	1	1	0	0	0	0	0
AG10	AG	nov	2022	0	0	0	1	0	0	1	1	0	0	0	0	1	1	0	0	0	0	0
AG11	AG	nov	2022	0	0	0	1	0	0	1	1	0	0	0	0	1	1	0	0	0	0	0
AG12	AG	nov	2022	0	0	0	1	0	0	1	1	0	0	0	0	0	1	0	0	0	0	0
AG13	AG	nov	2022	0	0	0	0	0	0	1	1	0	0	0	0	1	1	0	0	0	0	0
AG14	AG	nov	2022	0	0	0	0	1	0	1	1	0	0	0	0	1	1	0	1	0	0	0
AG15	AG	nov	2022	0	0	0	0	0	0	1	1	0	0	0	0	1	1	0	0	0	0	0
AG16	AG	nov	2022	0	0	0	0	0	0	1	1	0	0	0	0	1	1	0	0	0	0	0
AG17	AG	nov	2022	0	0	0	1	0	0	1	1	0	0	0	0	1	1	0	0	0	0	0
AG18	AG	nov	2022	0	0	0	0	0	0	1	1	0	0	0	0	1	0	0	0	0	0	0
AG19	AG	nov	2022	0	0	0	0	0	0	1	1	0	0	0	0	0	0	0	0	0	0	0
AG20	AG	nov	2022	0	0	0	0	0	0	1	1	0	0	0	0	1	1	0	0	0	0	0
AG21	AG	nov	2022	0	0	0	1	0	0	0	1	0	0	0	0	1	1	0	0	0	0	0
AG22	AG	nov	2022	0	0	0	1	0	0	1	0	0	0	0	0	1	1	0	0	0	0	0
AG23	AG	nov	2022	0	0	0	1	0	0	0	1	0	0	0	0	1	1	0	0	0	0	0
AG24	AG	nov	2022	0	0	0	1	0	0	0	1	0	0	0	0	1	1	0	0	0	0	0
AG25	AG	nov	2022	0	0	0	1	0	0	0	1	0	0	0	0	1	0	0	0	0	0	0
AG26	AG	nov	2022	0	0	0	1	0	0	0	1	0	0	0	0	1	0	0	0	0	0	0
SFV01	SFV	nov	2022	1	0	0	0	0	0	0	0	0	0	0	0	1	1	0	0	0	0	0
SFV02	SFV	nov	2022	1	0	0	1	1	0	0	0	0	0	0	0	1	1	0	0	0	0	0
SFV03	SFV	nov	2022	1	0	0	0	0	0	0	0	0	0	0	0	1	1	0	0	0	0	0
SFV04	SFV	nov	2022	1	0	0	0	1	0	0	0	0	0	0	0	1	1	0	0	0	0	0
SFV05	SFV	nov	2022	0	0	0	0	0	0	1	0	0	0	0	0	1	1	0	0	0	0	0
SFV06	SFV	nov	2022	1	0	0	0	0	0	0	0	0	0	0	0	1	1	0	0	0	0	0
SFV07	SFV	nov	2022	0	0	0	0	0	0	0	0	0	0	0	0	1	1	0	0	0	0	0
SFV08	SFV	nov	2022	1	0	0	0	0	0	0	0	0	0	0	0	1	1	0	0	0	0	0
SFV09	SFV	nov	2022	0	0	0	0	0	0	0	0	0	0	0	0	1	1	0	0	0	0	0
SFV10	SFV	nov	2022	0	0	0	0	0	0	0	0	0	0	0	0	0	0	0	0	0	0	0
SFV11	SFV	nov	2022	0	0	0	0	0	0	0	0	0	0	0	0	1	1	0	0	0	0	0
SFV12	SFV	nov	2022	0	0	0	0	0	0	1	0	0	0	0	0	1	1	0	0	0	0	0
SFV13	SFV	nov	2022	1	0	0	0	1	0	1	0	0	0	0	0	0	1	0	0	0	0	0
SFV14	SFV	nov	2022	0	0	0	0	0	0	1	0	0	0	0	0	1	1	0	0	0	0	0
SFV15	SFV	nov	2022	1	0	0	0	0	0	1	0	0	0	0	0	1	1	0	0	0	0	0
SFV16	SFV	nov	2022	1	0	0	0	0	0	0	0	0	0	0	0	1	1	0	0	0	0	0
SFV17	SFV	nov	2022	1	0	0	0	0	0	0	0	0	0	0	0	0	0	0	0	0	0	0
SFV18	SFV	nov	2022	1	0	0	1	0	0	0	0	0	0	0	0	1	1	0	0	0	0	0
SFV19	SFV	nov	2022	1	0	0	1	0	0	0	0	0	0	0	0	1	1	0	0	0	0	0
SFV20	SFV	nov	2022	1	0	0	0	0	0	0	0	0	0	0	0	0	1	0	0	0	0	0
SFV21	SFV	nov	2022	0	0	0	0	0	0	0	0	0	0	0	0	1	0	0	0	0	0	0
SFV22	SFV	nov	2022	1	0	0	1	0	0	1	0	0	0	0	0	1	1	0	0	0	0	0
SFV23	SFV	nov	2022	0	0	0	1	0	0	0	0	0	0	0	0	1	1	0	0	0	0	0
SFV24	SFV	nov	2022	1	0	0	1	0	0	0	0	0	0	0	0	1	1	0	0	0	0	0
SFV25	SFV	nov	2022	1	0	0	1	0	0	0	0	0	0	0	0	1	0	0	0	0	0	0
SFV26	SFV	nov	2022	1	0	0	1	0	0	0	1	0	0	0	0	1	1	0	0	0	0	0
SFV27	SFV	nov	2022	0	0	0	1	0	0	0	0	0	0	0	0	1	0	0	0	0	0	0
SFV28	SFV	nov	2022	0	0	0	1	0	0	0	0	0	0	0	0	1	1	0	0	0	0	0
SFV29	SFV	nov	2022	0	0	0	1	0	0	0	0	0	0	0	0	1	1	0	0	0	0	0
SFV30	SFV	nov	2022	0	0	0	1	0	0	0	0	0	0	0	0	1	1	0	0	0	0	0
RP01	RP	nov	2022	1	0	0	1	0	0	0	0	0	0	0	0	0	0	0	0	0	0	0
RP02	RP	nov	2022	0	0	0	1	0	0	0	0	1	0	0	0	0	0	0	0	0	0	0
RP03	RP	nov	2022	0	0	0	1	0	0	0	0	0	0	0	0	0	0	0	0	0	0	0
RP04	RP	nov	2022	0	0	0	1	0	0	0	0	0	0	0	0	0	0	0	0	0	0	0
RP05	RP	nov	2022	0	0	0	1	0	0	0	0	0	0	0	0	0	0	0	0	0	0	0
RP06	RP	nov	2022	1	0	0	1	0	0	0	0	0	0	0	0	0	0	0	0	0	0	0
RP07	RP	nov	2022	1	0	0	1	0	0	0	0	0	0	0	0	0	0	0	0	0	0	0
RP08	RP	nov	2022	1	1	0	1	0	0	0	0	0	0	0	0	0	0	0	0	0	0	0
RP09	RP	nov	2022	0	0	0	1	0	0	0	0	0	0	0	0	0	0	0	0	0	0	0
RP10	RP	nov	2022	0	1	0	1	0	0	0	0	1	0	0	0	0	0	0	0	0	0	0
RP11	RP	nov	2022	0	1	0	1	0	0	0	0	0	0	0	0	0	0	0	0	0	0	0
RP12	RP	nov	2022	0	1	0	1	0	0	0	0	0	0	0	0	0	0	0	0	0	0	0
RP13	RP	nov	2022	0	1	0	1	0	0	0	0	0	0	0	0	0	0	0	0	0	0	0
RP14	RP	nov	2022	0	1	0	1	0	0	0	0	0	0	0	0	0	0	0	0	0	0	0
RP15	RP	nov	2022	0	1	0	1	0	0	0	0	1	0	0	0	0	0	0	0	0	0	0
RP16	RP	nov	2022	0	1	0	1	0	0	0	0	0	0	0	0	0	0	0	0	0	0	0
RP17	RP	nov	2022	0	1	0	1	0	0	0	0	0	0	0	0	0	0	0	0	0	0	0
RP18	RP	nov	2022	1	1	0	1	0	0	0	0	0	0	0	0	0	0	0	0	0	0	0
RP19	RP	nov	2022	0	0	0	1	0	0	0	0	0	0	0	0	0	0	0	0	0	0	0
RP20	RP	nov	2022	0	0	0	0	0	0	0	0	0	0	0	0	0	0	0	0	0	0	0
RP21	RP	nov	2022	0	0	0	0	0	0	0	0	0	0	0	0	0	0	0	0	0	0	0
RP22	RP	nov	2022	0	0	0	1	0	0	0	0	0	0	0	0	0	0	0	0	0	0	0
RP23	RP	nov	2022	0	0	0	1	0	0	0	0	0	0	0	0	0	0	0	0	0	0	0
RP24	RP	nov	2022	0	0	0	1	0	0	0	0	0	0	0	0	0	0	0	0	0	0	0
RP25	RP	nov	2022	0	1	0	1	0	0	0	0	0	0	0	0	0	0	0	0	0	0	0
RP26	RP	nov	2022	1	0	0	1	0	0	0	0	0	0	0	0	0	0	0	0	0	0	0
RP27	RP	nov	2022	1	0	0	1	0	0	0	0	0	0	0	0	0	0	0	0	0	0	0
RP28	RP	nov	2022	0	1	0	0	0	0	0	0	0	0	0	0	0	0	0	0	0	0	0
PC01	PC	nov	2022	0	0	0	1	0	0	0	0	0	0	0	0	0	0	0	0	0	0	0
PC02	PC	nov	2022	0	0	0	1		1	0	0	0	0	0	0	0	0	0	0	0	0	0
PC03	PC	nov	2022	0	1	0	1			0	0	0	0	0	0	0	0	0	0	0	0	0
PC04	PC	nov	2022	0	1	0	1			0	0	0	0	0	0	0	0	0	0	0	0	0
PC05	PC	nov	2022	0	1	0	1			0	0	0	0	0	0	0	0	0	0	0	0	0
PC06	PC	nov	2022	0	0	0	1			0	0	0	0	0	0	0	0	0	0	0	0	0
PC07	PC	nov	2022	0	0	0	1			0	0	0	0	0	0	0	0	0	0	0	0	0
PC08	PC	nov	2022	0	0	0	1			0	0	0	0	0	0	0	0	0	0	0	0	0
PC09	PC	nov	2022	0	0	0	1			0	0	0	0	0	0	0	0	0	0	0	0	0
PC10	PC	nov	2022	0	0	0	1		1	0	0	0	0	0	0	0	0	0	0	0	0	0
PC11	PC	nov	2022	0	0	0	1		1	0	0	0	0	1	0	0	0	0	0	0	0	0
PC12	PC	nov	2022	0	0	0	1		1	0	0	1	0	0	0	0	1	0	0	0	0	0
PC13	PC	nov	2022	0	0	0	1		0	0	0	0	0	0	0	0	0	0	0	0	0	0
PC14	PC	nov	2022	0	0	0	0		1	0	0	0	0	0	0	0	0	0	0	0	0	0
PC15	PC	nov	2022	0	0	1	1	1	0	0	0	0	0	0	0	0	0	0	0	0	0	0
PC16	PC	nov	2022	0	0	0	0	0	0	0	0	0	0	0	0	0	0	0	0	0	0	0
PC17	PC	nov	2022	0	0	0	0	0	0	0	0	0	0	0	0	0	0	0	0	0	0	0
PC18	PC	nov	2022	0	0	0	1	0	0	0	0	1	0	0	0	0	0	0	0	0	0	0
PC19	PC	nov	2022	0	1	0	1	0	0	0	0	1	0	0	0	0	0	0	0	0	0	0
PC20	PC	nov	2022	0	0	0	1	0	0	0	0	0	0	0	0	0	0	0	0	0	0	0
PC21	PC	nov	2022	0	0	0	0	0	0	0	0	0	0	0	0	0	0	0	0	0	0	0
PC22	PC	nov	2022	0	0	0	1	0	0	0	0	0	0	0	0	0	0	0	0	0	0	0
PC23	PC	nov	2022	0	0	0	1	0	0	0	0	0	0	0	0	0	0	0	0	0	0	0
PC24	PC	nov	2022	0	0	0	1	0	0	0	0	0	0	0	0	0	0	0	0	0	0	0
PC25	PC	nov	2022	0	0	0	1	0	0	0	0	0	0	0	0	0	0	0	0	0	0	0
PC26	PC	nov	2022	0	0	0	1	0	0	0	0	0	0	1	0	0	0	0	0	0	0	0
PC27	PC	nov	2022	0	0	0	1	0	0	0	0	0	0	1	0	0	0	0	0	0	0	0
PC28	PC	nov	2022	0	1	0	1	0	0	0	0	0	0	1	0	0	0	0	0	0	0	0
PC29	PC	nov	2022	0	0	0	1	0	0	0	0	0	0	1	0	0	0	0	0	0	0	0
PC30	PC	nov	2022	0	0	0	1	0	0	0	0	0	0	0	0	0	0	0	0	0	0	0
OC01	OC	nov	2022	1	0	0	0	0	0	1	0	0	0	0	0	1	1	0	0	0	0	0
OC02	OC	nov	2022	0	0	0	0	0	0	0	0	0	0	0	0	0	1	0	0	0	0	0
OC03	OC	nov	2022	0	0	0	0	0	0	0	0	0	0	0	0	0	1	0	0	0	0	0
OC04	OC	nov	2022	1	0	0	0	0	0	0	1	1	0	0	0	1	0	0	0	0	0	0
OC05	OC	nov	2022	1	0	0	1	0	0	0	0	1	0	0	0	0	1	0	0	0	0	0
OC06	OC	nov	2022	1	0	0	1	0	0	0	0	0	0	0	0	0	0	0	0	0	0	0
OC07	OC	nov	2022	0	0	0	1	0	0	0	0	0	0	0	0	0	1	0	0	0	0	0
OC08	OC	nov	2022	1	1	0	1	0	0	0	0	1	0	0	0	0	0	0	0	0	0	0
OC10	OC	nov	2022	1	0	0	1	0	0	0	0	0	0	0	0	0	0	0	0	0	0	0
OC11	OC	nov	2022	1	0	0	1	0	0	0	0	0	0	0	0	0	0	0	0	0	0	0
OC12	OC	nov	2022	0	0	0	0	0	0	0	0	0	0	1	0	0	0	0	0	0	0	0
OC14	OC	nov	2022	0	0	0	1	0	0	0	0	0	0	0	0	0	0	0	0	0	0	0
OC15	OC	nov	2022	1	0	0	1	0	0	0	0	0	0	0	0	1	0	0	0	0	0	0
OC16	OC	nov	2022	1	0	0	1	0	0	0	0	0	0	0	0	0	0	0	0	0	0	0
OC17	OC	nov	2022	1	0	0	1	0	0	0	0	0	0	0	0	0	0	0	0	0	0	0
OC18	OC	nov	2022	0	0	0	1	0	0	0	0	0	0	0	0	0	0	0	0	0	0	0
OC19	OC	nov	2022	1	0	0	0	0	0	0	0	0	0	0	0	0	0	0	0	0	0	0
OC20	OC	nov	2022	0	0	0	1	0	0	0	0	0	0	0	0	0	0	0	0	0	0	0
OC22	OC	nov	2022	0	0	0	1	0	0	0	0	0	0	0	0	0	0	0	0	0	0	0
OC23	OC	nov	2022	1	0	0	1	0	0	0	0	1	0	0	0	0	0	0	0	0	0	0
OC24	OC	nov	2022	1	0	0	1	0	0	0	0	0	0	0	0	0	0	0	0	0	0	0
OC25	OC	nov	2022	1	0	0	1	0	0	0	0	0	0	0	0	0	0	0	0	0	0	0
OC26	OC	nov	2022	1	1	0	1	0	0	0	0	0	0	0	0	0	0	0	0	0	0	0
OC27	OC	nov	2022	1	0	0	1	0	0	0	0	1	0	0	0	0	0	0	0	0	0	0
OC28	OC	nov	2022	0	0	0	1	0	0	0	0	0	0	0	0	0	0	0	0	0	0	0
OC30	OC	nov	2022	0	0	0	1	0	0	0	0	0	0	0	0	0	0	0	0	0	0	0
SFF01	SFF	nov	2022	0	0	0	1	0	0	0	0	1	0	0	0	0	0	0	0	0	0	0
SFF02	SFF	nov	2022	0	0	0	1	0	0	0	0	1	0	0	0	0	0	0	0	0	0	0
SFF03	SFF	nov	2022	0	0	0	0	0	0	0	0	0	0	0	0	0	0	0	0	0	0	0
SFF04	SFF	nov	2022	0	0	0	0	0	0	0	0	0	0	0	0	0	0	0	0	0	0	0
SFF05	SFF	nov	2022	0	0	0	0	0	0	0	0	0	0	0	0	0	0	0	0	0	0	0
SFF06	SFF	nov	2022	0	0	0	0	0	0	1	0	0	0	0	0	0	1	0	0	0	0	0
SFF07	SFF	nov	2022	0	0	0	0	0	0	1	0	0	0	0	0	0	1	0	0	0	0	0
SFF08	SFF	nov	2022	0	0	0	0	0	0	0	0	0	0	0	0	0	0	0	0	0	0	0
SFF09	SFF	nov	2022	0	0	0	0	0	0	0	0	0	0	0	0	0	0	0	0	0	0	0
SFF10	SFF	nov	2022	0	0	0	0	0	0	0	0	0	0	0	0	0	0	0	0	0	0	0
SFF11	SFF	nov	2022	1	0	0	0	0	0	0	0	0	0	0	0	0	0	0	0	0	0	0
SFF12	SFF	nov	2022	0	0	0	0	0	0	0	0	0	0	0	0	1	1	0	0	0	0	0
SFF13	SFF	nov	2022	0	0	0	0	0	0	0	0	0	0	0	0	0	0	0	0	0	0	0
SFF14	SFF	nov	2022	0	0	0	0	0	0	0	0	0	0	0	0	0	1	0	0	0	0	0
SFF15	SFF	nov	2022	0	0	0	0	0	0	0	0	0	0	0	0	0	0	0	0	0	0	0
SFF16	SFF	nov	2022	1	0	0	0	0	0	0	0	0	0	0	0	0	0	0	0	0	0	0
SFF17	SFF	nov	2022	0	0	0	0	0	0	0	0	0	0	0	0	0	0	0	0	0	0	0
SFF18	SFF	nov	2022	0	0	0	0	0	0	0	0	1	0	0	0	0	0	0	0	0	0	0
SFF19	SFF	nov	2022	1	0	0	1	0	0	0	0	0	0	0	0	0	0	0	0	0	0	0
SFF20	SFF	nov	2022	0	0	0	1	0	0	0	0	0	0	0	0	0	0	0	0	0	0	0
SFF21	SFF	nov	2022	0	0	0	1	0	0	0	0	0	0	0	0	0	0	0	0	0	0	0
SFF22	SFF	nov	2022	1	0	0	0	0	0	0	0	0	0	0	0	0	0	0	0	0	0	0
SFF23	SFF	nov	2022	0	0	0	1	0	0	0	0	0	0	0	0	0	0	0	0	0	0	0
SFF24	SFF	nov	2022	0	0	0	1	0	0	0	0	0	0	0	0	0	0	0	0	0	0	0
SFF25	SFF	nov	2022	0	0	0	1	0	0	0	0	0	0	0	0	0	0	0	0	0	0	0
SFF26	SFF	nov	2022	0	0	0	1	0	0	0	0	0	0	0	0	0	0	0	0	0	0	0
SFF27	SFF	nov	2022	0	0	0	1	0	0	0	0	0	0	0	0	0	0	0	0	0	0	0
SFF28	SFF	nov	2022	0	0	0	1	0	0	0	0	0	0	0	0	0	0	0	0	0	0	0
SFF29	SFF	nov	2022	0	0	0	1	0	0	0	0	0	0	0	0	0	0	0	0	0	0	0
SFF30	SFF	nov	2022	0	0	0	1	0	0	0	0	0	0	0	0	0	0	0	0	0	0	0
AG01	AG	jun	2023	0	0	1	0	0	0	0	0	0	0	0	1	0	1	0	1	0		0
AG02	AG	jun	2023	0	1	1	1	0	0	0	0	0	0	1	1	0	1	0	0	0		1
AG03	AG	jun	2023	0	0	1	0	0	0	0	0	0	0	0	0	0	1	0	0	0		1
AG04	AG	jun	2023	0	0	1	0	0	1	0	0	1	0	0	1	0	1	0	0	0		1
AG05	AG	jun	2023	0	0	1	0	0	1	0	0	0	0	0	1	0	1	0	0	0		1
AG06	AG	jun	2023	1	0	1	0	0	1	0	0	0	0	0	0	0	0	0	0	0		1
AG07	AG	jun	2023	0	0	1	0	0	1	0	0	0	0	0	1	0	1	0	0	0		1
AG08	AG	jun	2023	0	0	1	0	0	1	0	0	0	0	0	0	0	1	0	0	0		1
AG09	AG	jun	2023	0	0	1	0	0	0	0	0	0	0	0	1	0	1	0	0	0		1
AG10	AG	jun	2023	0	0	1	0	0	0	0	0	0	0	0	1	0	1	0	0	0		0
AG18	AG	jun	2023	0	0	0	0	0	0	0	0	0	0	0	0	0	1	0	0	0	0	1
AG19	AG	jun	2023	0	0	1	0	0	0	0	0	0	0	0	0	0	1	0	0	0	0	1
AG20	AG	jun	2023	0	0	1	0	0	0	0	0	0	0	0	0	0	1	0	0	0	0	1
AG21	AG	jun	2023	0	0	1	0	0	1	0	0	0	0	0	1	0	1	0	0	0	0	1
AG22	AG	jun	2023	0	0	1	0	0	1	0	0	0	0	0	0	0	1	0	0	0	0	1
AG23	AG	jun	2023	0	0	1	0	0	1	0	0	0	0	0	0	0	1	0	0	0	0	1
AG24	AG	jul	2023	0	0	1	0	0	0	0	0	0	0	0	1	0	1	0	0	0	0	1
AG25	AG	jun	2023	0	0	1	0	0	1	0	0	0	0	0	0	0	1	0	0	0	0	1
AG26	AG	jun	2023	0	0	1	0	0	1	0	0	0	0	0	0	0	1	0	0	0	0	0
SJ01	SJ	jun	2023	0	0	0	0	0	1	0	0	0	1	0	0	0	0	0	0	0	0	1
SJ02	SJ	jun	2023	0	0	0	0	0	1	0	0	0	1	0	0	0	0	0	0	0	0	1
SJ03	SJ	jun	2023	0	1	0	0	0	1	0	0	0	1	0	0	0	0	0	0	0	0	1
SJ04	SJ	jun	2023	0	0	0	0	0	1	0	0	0	1	0	0	0	0	0	0	0	0	1
SJ05	SJ	jun	2023	0	0	0	0	0	0	0	0	0	0	0	0	0	0	0	0	0	0	0
SJ06	SJ	jun	2023	0	0	0	0	0	1	0	0	0	0	0	0	0	0	0	0	0	0	1
SJ07	SJ	jun	2023	0	0	0	0	1	1	0	0	0	1	0	0	0	1	0	0	0	0	1
SJ08	SJ	jun	2023	0	0	0	0	0	1	0	0	0	0	0	0	0	0	0	0	0	0	1
SJ09	SJ	jun	2023	0	0	0	0	0	1	0	0	0	1	0	0	0	0	0	0	0	0	1
SJ10	SJ	jun	2023	0	0	0	0	0	1	0	0	0	1	0	0	0	0	0	1	0	0	1
SJ11	SJ	jun	2023	0	0	0	0	0	1	0	0	0	1	0	0	0	0	0	0	0	0	1
SJ12	SJ	jun	2023	0	0	0	0	0	1	0	0	0	0	0	0	0	0	0	0	0	0	1
SJ13	SJ	jun	2023	0	0	0	0	0	1	0	0	0	1	0	0	0	0	0	0	0	0	1
SJ14	SJ	jun	2023	0	0	0	0	0	1	0	0	0	1	0	0	1	0	0	0	0	0	1
SJ15	SJ	jun	2023	0	0	0	0	0	1	0	0	0	1	0	0	0	0	0	0	0	0	1
SJ16	SJ	jun	2023	0	0	0	0	0	1	0	0	0	1	0	0	0	0	0	0	0	0	1
SJ17	SJ	jun	2023	0	0	0	0	0	1	0	0	0	0	0	0	0	1	0	0	0	0	1
SJ18	SJ	jun	2023	0	0	0	0	0	1	0	0	0	1	0	0	0	0	0	0	0	0	1
SJ19	SJ	jun	2023	0	1	0	0	0	1	0	0	0	1	0	0	0	0	0	0	0	0	1
SJ20	SJ	jun	2023	0	1	0	0	1	1	0	0	0	1	0	0	0	0	0	0	0	0	1
SJ21	SJ	jun	2023	0	0	0	0	0	1	0	0	0	1	0	0	0	0	0	0	0	0	1
SJ22	SJ	jun	2023	0	0	0	0	1	1	0	0	0	1	0	0	0	0	0	0	0	0	1
SJ23	SJ	jun	2023	0	0	0	0	1	1	0	0	0	1	0	0	1	1	0	0	0	0	0
SJ24	SJ	jul	2023	0	0	0	0	0	0	0	0	0	0	0	0	0	1	0	0	0	0	0
SJ25	SJ	jun	2023	0	0	0	0	0	1	0	0	0	1	0	0	1	0	0	0	0	0	1
SJ26	SJ	jun	2023	0	0	0	0	0	1	0	0	0	1	0	0	0	0	0	0	0	0	0
SJ27	SJ	jun	2023	0	0	0	0	1	1	0	0	0	1	0	0	0	0	0	0	0	0	1
SJ28	SJ	jun	2023	0	0	0	0	0	1	0	0	0	1	0	0	0	0	0	0	0	0	1
SJ29	SJ	jun	2023	0	0	0	0	1	1	0	0	0	1	0	0	0	0	0	0	0	0	1
OC01	OC	jun	2023	0	0	0	0	0	0	0	0	0	0	0	1	0	0	0	0	0	0	1
OC02	OC	jun	2023	0	1	0	0	0	0	0	0	0	0	0	0	0	0	0	0	0	0	1
OC03	OC	jun	2023	0	0	0	0	0	0	0	0	0	0	0	0	0	0	0	0	0	0	1
OC04	OC	jun	2023	0	1	0	0	0	0	0	0	0	0	0	1	0	1	0	0	0	0	1
OC05	OC	jun	2023	0	1	0	0	0	0	0	0	0	0	0	1	0	0	0	0	0	0	1
OC06	OC	jun	2023	0	1	0	0	0	0	0	0	0	0	0	1	0	0	0	0	0	0	1
OC07	OC	jun	2023	0	0	0	0	0	1	0	0	0	1	0	1	0	0	0	0	0	0	1
OC08	OC	jun	2023	0	0	0	0	0	0	0	0	0	1	0	1	0	1	0	0	0	0	1
OC10	OC	jun	2023	0	0	1	0	0	1	0	0	0	1	0	1	0	0	0	0	0	0	1
OC11	OC	jun	2023	0	0	1	0	0	1	0	0	0	0	0	1	0	0	0	0	0	0	1
OC12	OC	jun	2023	0	0	0	0	0	0	0	0	0	0	0	1	0	0	0	0	0	0	1
OC14	OC	jun	2023	0	0	0	0	0	1	0	0	0	1	0	0	0	1	0	0	0	0	1
OC15	OC	jun	2023	0	1	0	0	0	1	0	0	0	1	0	0	0	0	0	0	0	0	1
OC16	OC	jun	2023	1	0	0	0	0	1	0	0	0	1	0	1	0	0	0	0	0	0	1
OC17	OC	jun	2023	1	1	0	0	0	1	0	0	0	1	0	1	0	1	0	0	0	0	0
OC18	OC	jun	2023	0	0	0	0	0	1	0	0	0	1	0	1	0	0	0	0	0	0	1
OC19	OC	jun	2023	1	0	0	0	0	1	0	0	0	1	0	0	0	0	0	0	0	0	0
OC20	OC	jun	2023	0	0	0	0	0	0	0	0	0	0	0	0	0	0	0	0	0	0	1
OC22	OC	jun	2023	0	0	0	0	0	1	0	0	0	1	0	1	0	0	0	0	0	0	1
OC23	OC	jun	2023	1	0	0	0	0	1	0	0	0	1	0	1	0	0	0	0	0	0	0
OC24	OC	jun	2023	1	0	0	0	0	1	0	0	0	1	0	1	0	1	0	0	0	0	1
OC25	OC	jun	2023	1	0	0	0	0	1	0	0	0	1	0	0	0	0	0	0	0	0	1
OC26	OC	jun	2023	1	0	0	0	0	1	0	0	0	0	0	1	0	1	0	0	0	0	1
OC27	OC	jun	2023	0	0	0	0	0	1	0	0	0	1	0	0	0	1	0	0	0	0	1
OC28	OC	jun	2023	1	1	0	0	1	0	0	0	0	1	0	1	0	0	0	0	0	0	0
OC30	OC	jun	2023	0	0	0	0	0	0	0	0	0	1	0	1	0	0	0	0	0	0	0
SFF01	SFF	jun	2023	0	0	0	0	0	1	0	0	0	0	0	1	0	0	0	0	0	0	1
SFF02	SFF	jun	2023	0	0	0	0	0	1	0	0	0	0	0	1	0	1	0	0	0	0	1
SFF03	SFF	jun	2023	0	0	0	0	0	1	0	0	0	0	0	0	0	1	0	0	0	0	1
SFF04	SFF	jun	2023	0	0	0	0	1	1	0	0	0	0	0	0	0	1	0	0	0	0	1
SFF05	SFF	jun	2023	0	1	0	0	1	1	0	0	0	0	0	0	0	1	0	0	0	0	1
SFF06	SFF	jun	2023	0	0	0	0	0	1	0	0	0	0	0	0	0	1	0	0	0	0	1
SFF07	SFF	jun	2023	0	0	0	0	1	0	0	0	0	0	0	0	0	1	0	0	0	0	1
SFF08	SFF	jun	2023	0	1	0	0	1	1	0	0	0	0	0	0	0	1	0	1	0	0	1
SFF09	SFF	jun	2023	1	0	0	0	0	0	0	0	0	0	0	0	0	1	0	0	0	0	1
SFF10	SFF	jun	2023	1	0	0	0	0	1	0	0	0	0	0	0	0	1	0	0	0	0	1
SFF11	SFF	jun	2023	1	0	1	0	0	0	0	0	0	0	0	0	0	1	0	0	0	0	1
SFF12	SFF	jun	2023	0	0	1	0	0	0	0	0	0	0	0	0	0	1	0	0	0	0	1
SFF13	SFF	jun	2023	0	0	1	0	0	0	0	0	0	0	0	0	0	1	0	0	0	0	1
SFF14	SFF	jun	2023	0	1	0	0	0	0	0	0	0	0	0	0	0	1	0	0	0	0	1
SFF15	SFF	jun	2023	0	0	1	1	0	0	0	0	0	0	0	0	0	1	0	0	0	0	1
SFF16	SFF	jun	2023	1	0	1	0	0	1	0	0	0	0	0	0	0	1	0	0	0	0	1
SFF17	SFF	jun	2023	0	0	0	0	1	1	0	0	0	0	0	0	0	1	0	0	0	0	1
SFF18	SFF	jun	2023	0	0	0	0	0	0	0	0	0	0	0	0	0	1	0	0	0	0	1
SFF19	SFF	jun	2023	1	0	0	0	0	0	0	0	0	0	0	0	0	1	0	0	0	0	1
SFF20	SFF	jun	2023	0	0	0	0	0	0	0	0	0	0	0	0	0	0	0	0	0	0	1
SFF21	SFF	jun	2023	0	0	0	0	0	1	0	0	0	0	0	1	0	1	0	0	0	0	1
SFF22	SFF	jun	2023	1	1	0	0	0	1	0	0	0	0	0	0	0	1	0	0	0	0	1
SFF23	SFF	jun	2023	0	0	0	0	1	0	0	0	0	0	0	1	0	1	0	0	0	0	1
SFF24	SFF	jun	2023	0	0	0	0	0	1	0	0	0	0	0	1	0	1	0	0	0	0	1
SFF25	SFF	jun	2023	0	1	0	0	0	1	0	0	0	0	0	0	0	1	0	0	0	0	1
SFF26	SFF	jun	2023	0	0	0	0	0	1	0	0	0	0	0	1	0	0	0	0	0	0	1
SFF27	SFF	jun	2023	0	0	0	0	0	0	0	0	0	0	0	0	0	1	0	0	0	0	1
SFF28	SFF	jun	2023	1	1	0	0	0	1	0	0	0	1	0	0	0	1	0	0	0	0	1
SFF29	SFF	jun	2023	0	0	0	0	0	1	0	0	0	0	0	0	0	1	0	0	0	0	1
SFF30	SFF	jun	2023	0	0	0	0	0	0	0	0	0	1	0	0	0	1	0	0	0	0	1
SFV01	SFV	jun	2023	1	1	1	0	0	1	0	0	0	1	0	1	0	1	0	0	0	0	1
SFV02	SFV	jun	2023	0	0	1	0	0	0	0	0	0	0	0	0	0	1	0	0	0	0	1
SFV03	SFV	jun	2023	0	0	1	0	0	0	0	0	0	0	0	0	0	1	0	0	0	0	1
SFV04	SFV	jun	2023	0	0	1	0	0	0	0	0	0	0	0	1	0	0	0	0	0	0	1
SFV05	SFV	jun	2023	0	0	1	0	0	0	0	0	0	0	0	0	0	1	0	0	0	0	1
SFV06	SFV	jun	2023	0	0	0	0	0	1	0	0	0	0	0	1	0	1	0	0	0	0	1
SFV07	SFV	jun	2023	0	0	1	0	0	0	0	0	0	0	0	0	0	1	0	0	0	0	1
SFV08	SFV	jun	2023	0	0	1	0	0	0	0	0	0	0	0	1	0	0	0	0	0	0	1
SFV09	SFV	jun	2023	0	1	1	0	0	0	0	0	0	0	0	1	0	0	0	0	0	0	1
SFV10	SFV	jun	2023	0	0	0	0	0	0	0	0	0	0	0	0	0	0	0	0	0	0	1
SFV11	SFV	jun	2023	0	0	0	0	0	0	0	0	0	0	0	1	0	0	0	0	0	0	1
SFV12	SFV	jun	2023	0	0	0	0	0	0	0	0	0	0	0	0	0	0	0	0	0	0	1
SFV13	SFV	jun	2023	0	0	0	0	0	0	0	0	0	0	0	0	0	0	0	0	0	0	1
SFV14	SFV	jun	2023	0	0	0	0	0	0	0	0	0	0	0	0	0	0	0	0	0	0	1
SFV15	SFV	jun	2023	0	0	1	0	0	0	0	0	0	0	0	0	0	0	0	0	0	0	1
SFV16	SFV	jun	2023	0	1	1	0	0	0	0	0	0	0	0	0	0	1	0	0	0	0	1
SFV17	SFV	jun	2023	0	1	0	0	0	0	0	0	0	0	0	0	1	1	0	0	0	0	1
SFV18	SFV	jun	2023	1	1	1	0	0	1	0	0	0	0	0	0	0	1	0	0	0	0	1
SFV19	SFV	jun	2023	0	1	0	0	0	0	0	0	0	0	0	1	0	1	0	0	0	0	0
SFV20	SFV	jun	2023	0	0	0	0	0	0	0	0	0	0	0	1	0	0	0	0	0	0	1
SFV21	SFV	jun	2023	1	1	0	0	0	1	0	0	0	0	0	0	0	1	0	0	0	0	1
SFV22	SFV	jun	2023	1	1	0	0	0	1	0	0	0	0	0	0	0	1	0	0	0	0	1
SFV23	SFV	jun	2023	1	0	1	0	0	0	0	0	0	0	0	1	0	1	0	0	0	0	1
SFV24	SFV	jun	2023	1	1	0	0	0	0	0	0	0	0	0	0	0	1	0	0	0	0	1
SFV25	SFV	jun	2023	0	1	1	0	0	1	0	0	0	0	0	1	0	1	0	0	0	0	1
SFV26	SFV	jun	2023	1	1	1	0	0	1	0	0	0	0	0	0	0	1	0	0	0	0	1
SFV27	SFV	jun	2023	0	0	1	0	0	1	0	0	0	0	0	1	0	1	0	0	0	0	0
SFV28	SFV	jun	2023	1	0	1	0	0	0	0	0	0	0	0	0	0	0	0	0	0	0	1
SFV29	SFV	jun	2023	0	0	1	0	0	0	0	0	0	0	0	1	0	1	0	0	0	0	1
SFV30	SFV	jun	2023	0	0	1	0	0	1	0	0	0	0	0	1	0	0	0	0	0	0	1
RP01	RP	jun	2023	0	0	0	0	0	1	0	0	0	1	0	0	0	0	0	0	0	0	0
RP02	RP	jun	2023	1	1	0	0	1	0	0	0	0	1	0	0	0	1	0	0	0	0	1
RP03	RP	jun	2023	0	0	0	0	0	1	0	0	0	1	0	0	0	0	0	0	0	0	1
RP04	RP	jun	2023	0	0	0	0	1	1	0	0	0	1	0	0	0	1	0	0	0	0	1
RP05	RP	jun	2023	0	0	0	0	0	1	0	0	0	1	0	1	0	0	0	0	0	0	0
RP06	RP	jun	2023	0	0	0	0	0	1	0	0	0	0	0	0	0	0	0	0	0	0	0
RP07	RP	jun	2023	1	0	0	0	1	1	0	0	0	0	0	0	0	0	0	0	0	0	1
RP08	RP	jun	2023	1	0	0	0	0	1	0	0	0	1	0	0	0	0	0	0	0	0	1
RP09	RP	jun	2023	1	0	0	0	0	1	0	0	0	0	0	0	0	0	0	0	0	0	1
RP10	RP	jun	2023	1	0	0	0	0	1	0	1	0	0	0	0	0	1	0	0	0	0	1
RP11	RP	jun	2023	0	0	0	0	1	1	0	0	0	0	0	0	0	0	0	0	0	0	1
RP12	RP	jun	2023	0	0	0	0	1	1	0	0	0	1	0	0	0	1	0	0	0	0	1
RP13	RP	jun	2023	0	0	0	0	0	0	0	0	0	0	0	0	0	0	0	0	0	0	1
RP14	RP	jun	2023	1	0	0	0	0	1	0	0	0	0	0	0	0	0	0	0	0	0	1
RP15	RP	jun	2023	0	0	0	0	0	0	0	0	0	0	0	0	0	0	0	0	0	0	1
RP16	RP	jun	2023	1	0	0	0	0	1	0	0	0	0	0	0	0	0	0	0	0	0	1
RP17	RP	jun	2023	0	0	0	0	1	1	0	0	0	0	0	0	0	0	0	0	0	0	1
RP18	RP	jun	2023	0	0	0	0	0	1	0	0	0	0	0	0	0	0	0	0	0	0	1
RP19	RP	jun	2023	0	0	0	0	0	0	0	0	0	0	0	0	0	0	0	0	0	0	1
RP20	RP	jun	2023	0	0	0	0	1	0	0	0	0	1	0	0	0	1	0	0	0	0	1
RP21	RP	jun	2023	0	0	0	0	0	0	0	0	0	1	0	0	0	0	0	0	0	0	0
RP22	RP	jun	2023	0	0	0	0	0	1	0	0	0	1	0	0	0	0	0	0	0	0	0
RP23	RP	jun	2023	0	0	0	0	0	1	0	0	0	1	0	0	0	0	0	0	0	0	0
RP24	RP	jun	2023	0	0	0	0	1	0	0	0	0	1	0	0	0	0	0	0	0	0	0
RP25	RP	jun	2023	0	0	0	0	0	0	0	0	0	1	0	0	0	1	0	0	0	0	1
RP26	RP	jun	2023	0	0	0	0	0	0	0	0	0	0	0	0	0	1	0	0	0	0	1
RP27	RP	jun	2023	0	0	0	0	0	0	0	0	0	0	0	0	0	1	0	0	0	0	1
RP28	RP	jun	2023	0	0	0	0	0	0	0	0	0	0	0	0	0	0	0	0	0	0	0
RP29	RP	jun	2023	0	0	0	0	0	0	0	0	0	0	0	0	0	0	0	0	0	0	0
PC01	PC	jun	2023	0	0	0	0	0	0	0	0	0	0	0	0	0	0	0	0	0	0	1
PC02	PC	jun	2023	0	0	0	0	0	0	0	0	0	0	0	0	0	0	0	0	0	0	1
PC03	PC	jun	2023	0	0	0	0	0	1	0	0	0	0	0	0	0	0	0	0	0	0	1
PC04	PC	jun	2023	0	0	0	0	0	1	0	0	0	0	0	0	0	0	0	0	0	0	1
PC05	PC	jun	2023	0	0	0	0	0	1	0	0	0	0	0	0	0	0	0	0	0	0	1
PC06	PC	jun	2023	0	0	1	0	1	1	0	0	0	1	0	0	0	0	0	0	0	0	1
PC07	PC	jun	2023	0	0	0	0	1	0	0	0	0	1	0	0	0	0	0	0	0	0	0
PC08	PC	jun	2023	0	0	0	0	1	1	0	0	0	1	0	0	0	0	0	0	0	0	1
PC09	PC	jun	2023	0	0	0	0	1	1	0	0	0	1	0	0	0	0	0	0	0	0	1
PC10	PC	jun	2023	0	0	0	0	1	0	0	0	0	1	0	0	0	0	0	0	0	0	1
PC11	PC	jun	2023	0	0	0	0	1	0	0	0	0	0	0	0	0	0	0	0	0	0	1
PC12	PC	jun	2023	0	0	0	0	1	0	0	0	0	0	0	0	0	1	0	0	0	0	1
PC13	PC	jun	2023	0	0	0	0	0	0	0	0	0	0	0	0	0	1	0	0	0	0	1
PC14	PC	jun	2023	0	0	0	0	1	0	0	0	0	1	0	0	0	1	0	0	0	0	1
PC15	PC	jun	2023	0	0	0	0	1	1	0	0	0	1	0	0	0	1	0	0	0	0	1
PC16	PC	jun	2023	0	0	0	0	0	0	0	0	0	0	0	0	0	0	0	0	0	0	0
PC17	PC	jun	2023	0	0	0	0	1	0	0	1	0	1	0	0	0	0	0	0	0	0	1
PC18	PC	jun	2023	0	0	0	0	0	0	0	0	0	1	0	0	0	0	0	0	0	0	1
PC19	PC	jun	2023	0	0	0	0	0	1	0	0	0	0	0	0	0	0	0	0	0	0	1
PC20	PC	jun	2023	0	0	0	0	1	1	0	0	0	1	0	0	0	0	0	0	0	0	1
PC21	PC	jun	2023	0	0	0	0	1	1	0	0	0	1	0	0	0	0	0	0	0	0	1
PC22	PC	jun	2023	0	0	0	0	1	1	0	0	0	1	0	0	0	0	0	0	0	0	1
PC23	PC	jun	2023	0	0	0	0	0	1	0	0	0	0	0	0	0	0	0	0	0	0	1
PC24	PC	jun	2023	0	0	0	0	0	1	0	0	0	0	0	0	0	0	0	0	0	0	0
PC25	PC	jun	2023	0	0	0	0	0	1	0	0	0	0	0	0	0	0	0	0	0	0	0
PC26	PC	jun	2023	0	0	0	0	0	1	0	0	0	0	0	0	0	0	0	0	0	0	1
PC27	PC	jun	2023	0	0	0	0	0	1	0	0	0	0	0	0	0	0	0	0	0	0	0
PC28	PC	jun	2023	0	0	0	0	0	1	0	0	0	1	0	0	0	0	0	0	0	0	1
PC29	PC	jun	2023	0	0	0	0	0	1	0	0	0	1	0	0	0	0	0	0	0	0	0
PC30	PC	jun	2023	0	0	0	0	0	0	0	0	0	0	0	0	0	0	0	0	0	0	1
SV01	SV	jun	2023	0	0	0	0	0	1	0	0	0	0	0	0	0	0	0	0	0	0	1
SV02	SV	jun	2023	0	0	1	0	0	1	0	0	0	1	1	0	0	1	0	0	0	0	1
SV03	SV	jun	2023	0	1	0	0	0	1	0	0	0	0	0	0	0	0	0	0	0	0	1
SV04	SV	jun	2023	0	0	0	0	0	1	0	0	0	1	0	0	0	0	0	0	0	0	1
SV05	SV	jun	2023	0	0	0	0	0	1	0	0	0	0	0	0	0	0	0	0	0	0	1
SV06	SV	jun	2023	0	0	0	0	0	1	0	0	0	0	0	0	0	0	0	0	0	0	0
SV07	SV	jun	2023	0	1	0	0	0	1	0	0	0	0	0	0	0	1	0	0	0	0	0
SV08	SV	jun	2023	0	0	0	0	0	1	0	0	0	0	0	0	0	0	0	0	0	0	0
SV09	SV	jun	2023	0	0	0	0	0	1	0	0	0	0	0	0	0	0	0	0	0	0	1
SV10	SV	jun	2023	0	0	0	0	0	1	0	0	0	0	0	0	0	0	0	0	0	0	1
SV11	SV	jun	2023	0	0	0	0	0	0	0	0	0	0	0	0	0	1	0	0	0	0	1
SV12	SV	jun	2023	1	0	0	0	0	1	0	0	0	0	0	0	0	1	0	0	0	0	1
SV13	SV	jun	2023	0	0	0	0	0	1	0	0	0	0	0	0	0	0	0	0	0	0	1
SV14	SV	jun	2023	0	0	0	0	0	1	0	0	0	0	0	0	0	0	0	0	0	0	1
SV15	SV	jun	2023	0	0	0	0	0	1	0	0	0	1	0	0	0	1	0	0	0	0	1
SV16	SV	jun	2023	0	0	0	0	0	1	0	0	0	0	0	0	0	1	0	0	0	0	1
SV17	SV	jun	2023	0	0	0	0	0	1	0	0	0	0	0	0	0	1	0	0	0	0	1
SV18	SV	jun	2023	0	0	0	0	0	1	0	0	0	1	0	0	0	0	0	0	0	0	1
SV19	SV	jun	2023	0	0	0	0	0	1	0	0	0	0	0	0	0	0	0	0	0	0	1
SV20	SV	jun	2023	0	0	0	0	0	0	0	0	0	0	0	0	0	0	0	0	0	0	0
SV21	SV	jun	2023	0	0	0	0	0	1	0	0	0	0	0	0	0	0	0	0	0	0	1
SV22	SV	jun	2023	0	0	0	0	1	1	0	0	0	0	0	0	0	1	0	0	0	0	1
SV23	SV	jun	2023	0	0	0	0	0	1	0	0	0	0	0	0	0	0	0	0	0	0	1
SV25	SV	jun	2023	0	0	0	0	0	1	0	0	0	1	0	0	0	1	0	0	0	0	1
SV26	SV	jun	2023	0	0	0	0	1	0	0	0	0	0	0	0	0	0	0	0	0	0	1
SV27	SV	jun	2023	0	0	0	0	0	1	0	0	0	0	0	0	0	0	0	0	0	0	1
SV29	SV	jun	2023	0	0	0	0	0	1	0	0	0	0	0	0	0	0	0	0	0	0	1
SV30	SV	jun	2023	0	0	0	0	1	1	0	0	0	1	0	0	0	1	0	0	0	0	1
SJ01	SJ	nov	2023	0	0	0	0	0	1	0	0	0	1	0	0	0	0	0	0	0	0	1
SJ02	SJ	nov	2023	0	0	0	0	0	1	0	0	0	1	0	0	0	0	0	0	0	0	0
SJ03	SJ	nov	2023	0	1	0	0	0	0	0	0	0	1	0	0	0	0	0	0	0	0	1
SJ04	SJ	nov	2023	0	0	0	0	1	1	0	0	0	1	0	0	0	0	0	0	0	0	1
SJ05	SJ	nov	2023	0	0	0	0	0	1	0	0	0	1	0	0	0	0	0	0	0	0	1
SJ06	SJ	nov	2023	0	0	0	0	0	1	0	0	0	0	0	0	0	0	0	0	0	0	1
SJ07	SJ	nov	2023	0	0	0	0	0	1	0	0	0	1	0	0	0	1	0	0	0	0	1
SJ08	SJ	nov	2023	0	0	0	0	0	1	0	0	0	0	0	0	0	0	0	0	0	0	1
SJ09	SJ	nov	2023	0	0	0	0	0	1	0	0	0	1	0	0	0	0	0	0	0	0	1
SJ10	SJ	nov	2023	0	0	0	0	0	1	0	0	0	0	0	0	0	0	0	1	0	0	1
SJ11	SJ	nov	2023	0	0	0	0	0	1	0	0	0	1	0	0	0	0	0	0	0	0	0
SJ12	SJ	nov	2023	0	0	0	0	0	1	0	0	0	1	0	0	0	0	0	0	0	0	1
SJ13	SJ	nov	2023	0	0	0	0	0	1	0	0	0	0	0	0	1	0	0	0	0	0	1
SJ14	SJ	nov	2023	0	0	0	0	0	1	0	0	0	0	0	0	1	0	0	0	0	0	1
SJ15	SJ	nov	2023	0	0	0	0	0	1	0	0	0	1	0	0	1	0	0	0	0	0	1
SJ16	SJ	nov	2023	0	0	0	0	1	0	0	0	0	0	0	0	1	0	0	0	0	0	1
SJ17	SJ	nov	2023	0	0	0	0	0	1	0	0	0	0	0	0	0	1	0	0	0	0	1
SJ18	SJ	nov	2023	0	0	0	0	0	1	0	0	0	1	0	0	1	0	0	0	0	0	1
SJ19	SJ	nov	2023	0	0	0	0	0	1	0	0	0	1	0	0	0	0	0	0	0	0	1
SJ20	SJ	nov	2023	0	0	0	0	0	0	0	0	0	0	0	0	0	0	0	0	0	0	0
SJ21	SJ	nov	2023	0	0	0	0	0	0	0	0	0	0	0	0	0	0	0	0	0	0	0
SJ22	SJ	nov	2023	0	0	0	0	0	1	0	0	0	1	0	0	0	0	0	0	0	0	1
SJ23	SJ	nov	2023	0	0	0	0	0	1	0	0	0	1	0	0	1	0	0	0	0	0	1
SJ24	SJ	nov	2023	0	0	0	0	0	1	0	0	0	1	0	0	0	0	0	0	0	0	1
SJ25	SJ	nov	2023	0	0	0	0	0	1	0	0	0	1	0	0	1	0	0	0	0	0	1
SJ26	SJ	nov	2023	0	0	0	0	0	1	0	0	0	1	0	0	0	0	0	0	0	0	1
SJ27	SJ	nov	2023	0	0	0	0	0	1	0	0	0	0	0	0	0	0	0	0	0	0	1
SJ28	SJ	nov	2023	0	0	0	0	0	1	0	0	0	1	0	0	1	0	0	0	0	0	1
SJ29	SJ	nov	2023	0	0	0	0	0	1	0	0	0	1	0	0	0	0	0	0	0	0	1
OC01	OC	nov	2023	0	0	0	0	0	0	0	0	0	0	0	0	0	0	0	0	0	0	1
OC02	OC	nov	2023	0	0	0	0	0	0	0	0	0	0	0	1	0	0	0	0	0	0	1
OC03	OC	nov	2023	0	0	0	0	0	0	0	0	0	0	0	0	0	0	0	0	0	0	1
OC04	OC	nov	2023	0	0	0	0	0	0	0	0	0	0	0	1	0	0	0	0	0	0	1
OC05	OC	nov	2023	1	1	1	0	0	0	0	0	0	0	0	1	0	0	0	0	0	0	1
OC06	OC	nov	2023	1	0	1	0	0	0	0	0	0	0	0	1	0	0	0	0	0	0	1
OC07	OC	nov	2023	1	1	0	0	0	1	0	0	0	0	0	1	0	0	0	0	0	0	1
OC08	OC	nov	2023	0	0	0	0	0	0	0	0	0	0	0	0	0	0	0	0	0	0	0
OC10	OC	nov	2023	0	0	0	0	0	1	0	0	0	1	0	1	0	0	0	0	0	0	1
OC11	OC	nov	2023	1	0	0	0	0	1	0	0	0	0	0	1	0	0	0	0	0	0	0
OC12	OC	nov	2023	0	0	0	0	0	0	0	0	0	0	0	0	0	0	0	0	0	0	1
OC14	OC	nov	2023	1	0	0	0	0	1	0	0	0	1	0	0	0	0	0	0	0	0	1
OC15	OC	nov	2023	0	0	0	0	0	1	0	0	0	0	0	1	0	0	0	0	0	0	1
OC16	OC	nov	2023	0	0	0	0	0	1	0	0	0	1	0	0	0	0	0	0	0	0	1
OC17	OC	nov	2023	1	0	0	0	0	1	0	0	0	1	0	0	0	0	0	0	0	0	1
OC18	OC	nov	2023	0	0	0	0	0	1	0	0	0	1	0	0	0	0	0	0	0	0	1
OC19	OC	nov	2023	0	0	0	0	0	1	0	0	0	1	0	0	0	0	0	0	0	0	1
OC20	OC	nov	2023	0	0	0	0	1	0	0	0	0	0	0	0	0	0	0	0	0	0	1
OC22	OC	nov	2023	0	0	0	0	0	1	0	0	0	0	0	0	0	0	0	0	0	0	1
OC23	OC	nov	2023	1	0	0	0	0	0	0	0	0	1	0	0	0	0	0	0	0	0	0
OC24	OC	nov	2023	1	0	0	0	0	0	0	0	0	1	0	1	0	0	0	0	0	0	1
OC25	OC	nov	2023	0	0	0	0	0	0	0	0	0	1	0	0	0	0	0	0	0	0	1
OC26	OC	nov	2023	1	0	0	0	0	0	0	0	0	1	0	1	0	0	0	0	0	0	1
OC27	OC	nov	2023	1	0	0	0	1	1	0	0	0	1	0	0	0	0	0	0	0	0	0
OC28	OC	nov	2023	1	0	0	0	0	1	0	0	0	1	0	0	0	0	0	0	0	0	0
OC30	OC	nov	2023	0	0	0	0	0	0	0	0	0	0	0	0	0	0	0	0	0	0	0
SV01	SV	nov	2023	0	0	0	0	0	0	0	0	0	0	0	0	0	0	0	0	0	0	1
SV02	SV	nov	2023	0	0	0	0	0	0	0	0	0	0	0	0	0	0	0	0	0	0	1
SV03	SV	nov	2023	1	0	0	0	0	0	0	0	0	0	0	0	0	0	0	0	0	0	1
SV04	SV	nov	2023	0	0	0	0	0	0	0	0	0	0	0	0	0	0	0	0	0	0	0
SV05	SV	nov	2023	0	0	0	0	0	0	0	0	0	0	0	0	0	0	0	0	0	0	0
SV06	SV	nov	2023	0	0	0	0	0	0	0	0	0	0	0	0	0	0	0	0	0	0	1
SV07	SV	nov	2023	0	1	0	0	0	0	0	0	0	0	0	0	0	0	0	0	0	0	0
SV08	SV	nov	2023	1	0	0	0	0	0	0	0	0	0	0	0	0	0	0	0	0	0	0
SV09	SV	nov	2023	0	0	0	0	0	0	0	0	0	0	0	0	0	0	0	0	0	0	1
SV10	SV	nov	2023	0	0	0	0	0	0	0	0	0	0	0	0	0	0	0	0	0	0	1
SV11	SV	nov	2023	0	0	0	0	0	0	0	0	0	0	0	0	0	0	0	0	0	0	1
SV12	SV	nov	2023	0	0	0	0	0	0	0	0	0	0	0	0	0	0	0	0	0	0	1
SV13	SV	nov	2023	0	0	0	0	0	0	0	0	0	0	0	0	0	0	0	0	0	0	1
SV14	SV	nov	2023	0	0	0	0	0	0	0	0	0	0	0	0	0	0	0	0	0	0	1
SV15	SV	nov	2023	0	0	0	0	0	0	0	0	0	0	0	0	0	1	0	0	0	0	1
SV16	SV	nov	2023	0	0	0	0	0	0	0	0	0	0	0	0	0	0	0	0	0	0	1
SV17	SV	nov	2023	1	0	0	0	0	0	0	0	0	0	0	0	0	1	0	0	0	0	1
SV18	SV	nov	2023	0	0	0	0	0	0	0	0	0	0	0	0	0	1	0	0	0	0	1
SV19	SV	nov	2023	0	0	0	0	0	0	0	0	0	0	0	0	0	1	0	0	0	0	1
SV20	SV	nov	2023	0	0	0	0	0	0	0	0	0	0	0	0	0	0	0	0	0	0	0
SV21	SV	nov	2023	0	0	0	0	0	0	0	0	0	0	0	0	0	0	0	0	0	0	1
SV22	SV	nov	2023	0	0	0	0	0	0	0	0	0	0	0	0	0	0	0	0	0	0	1
SV23	SV	nov	2023	0	0	0	0	0	0	0	0	0	0	0	0	0	0	0	0	0	0	1
SV25	SV	nov	2023	0	0	0	0	0	0	0	0	0	0	0	0	0	0	0	0	0	0	1
SV26	SV	nov	2023	0	0	0	0	0	0	0	0	0	0	0	0	0	0	0	0	0	0	0
SV27	SV	nov	2023	0	0	0	0	0	0	0	0	0	0	0	0	0	0	0	0	0	0	0
SV29	SV	nov	2023	0	0	0	0	0	1	0	0	0	0	0	0	0	0	0	0	0	0	1
SV30	SV	nov	2023	0	0	0	0	0	0	0	0	0	0	0	0	0	1	0	0	0	0	1
SFF01	SFF	nov	2023	0	0	0	0	0	1	0	0	0	0	0	0	0	0	0	0	0	0	1
SFF02	SFF	nov	2023	0	0	0	0	1	1	0	0	0	0	0	1	0	0	0	0	0	0	1
SFF03	SFF	nov	2023	0	0	0	0	0	1	0	0	0	0	0	0	0	0	0	0	0	0	1
SFF04	SFF	nov	2023	0	1	0	0	0	1	0	0	0	0	0	0	0	0	0	0	0	0	1
SFF05	SFF	nov	2023	0	0	0	0	0	1	0	0	0	0	0	0	0	0	0	0	0	0	1
SFF06	SFF	nov	2023	0	0	0	0	0	1	0	0	0	0	0	0	0	1	0	0	1	0	1
SFF07	SFF	nov	2023	0	0	0	0	0	1	0	0	0	0	0	0	0	1	0	0	0	0	1
SFF08	SFF	nov	2023	0	1	0	0	0	1	0	1	0	0	0	0	0	0	0	0	0	0	0
SFF09	SFF	nov	2023	0	0	0	0	0	1	0	0	0	0	0	0	0	0	0	0	0	0	0
SFF10	SFF	nov	2023	0	1	1	0	0	1	0	0	0	0	0	0	0	1	0	0	0	0	1
SFF11	SFF	nov	2023	0	0	0	0	0	0	0	0	0	0	0	0	0	1	0	0	0	0	1
SFF12	SFF	nov	2023	0	0	1	0	0	0	0	0	0	0	0	0	0	1	0	0	0	0	1
SFF13	SFF	nov	2023	1	0	0	0	0	0	0	0	0	0	0	0	0	1	0	0	0	0	1
SFF14	SFF	nov	2023	1	0	0	0	0	0	0	0	0	0	0	0	0	1	0	0	0	0	1
SFF15	SFF	nov	2023	0	0	1	0	0	0	0	0	0	0	0	0	0	1	0	0	0	0	1
SFF16	SFF	nov	2023	1	1	0	0	0	0	0	0	0	0	0	0	0	0	0	0	0	0	1
SFF17	SFF	nov	2023	0	0	0	0	0	1	0	0	0	0	0	0	0	0	0	0	0	0	1
SFF18	SFF	nov	2023	0	0	0	0	0	1	0	1	0	0	0	0	0	0	0	0	0	0	1
SFF19	SFF	nov	2023	1	0	0	0	0	0	0	0	0	0	0	0	0	0	0	0	0	0	1
SFF20	SFF	nov	2023	0	0	0	0	0	1	0	1	0	0	0	0	0	0	0	0	0	0	1
SFF21	SFF	nov	2023	0	0	0	0	0	1	0	0	0	0	0	1	0	0	0	0	0	0	0
SFF22	SFF	nov	2023	1	0	1	0	0	1	0	0	0	0	0	0	0	1	0	0	0	0	1
SFF23	SFF	nov	2023	0	0	0	0	0	1	0	0	0	0	0	0	1	0	0	0	0	0	1
SFF24	SFF	nov	2023	0	0	0	0	0	1	0	0	0	0	0	1	0	1	0	0	0	0	0
SFF25	SFF	nov	2023	0	0	0	0	0	1	1	0	0	0	0	0	1	0	0	0	0	0	0
SFF26	SFF	nov	2023	0	0	0	0	0	1	1	0	0	0	0	1	0	0	0	0	0	0	0
SFF27	SFF	nov	2023	0	0	0	0	0	1	0	0	0	1	0	0	0	1	0	0	0	0	1
SFF28	SFF	nov	2023	0	0	0	0	0	1	0	0	1	1	0	0	0	1	0	0	0	0	0
SFF29	SFF	nov	2023	0	0	0	0	0	0	0	0	0	0	0	0	1	0	0	0	0	0	0
SFF30	SFF	nov	2023	0	0	1	0	0	1	0	0	0	0	0	1	0	1	0	0	0	0	1
SFV01	SFV	nov	2023	1	0	0	0	0	0	0	0	0	0	0	1	0	0	0	0	0	0	1
SFV02	SFV	nov	2023	0	0	0	0	0	0	0	0	0	0	0	0	0	1	0	0	0	0	1
SFV03	SFV	nov	2023	0	0	0	0	0	0	0	0	0	0	0	0	0	0	0	0	0	0	1
SFV04	SFV	nov	2023	1	1	0	0	0	0	0	0	0	0	0	1	0	0	0	0	0	0	1
SFV05	SFV	nov	2023	0	0	0	0	0	0	0	0	0	0	0	1	0	0	0	0	0	0	1
SFV06	SFV	nov	2023	0	0	0	0	0	0	0	0	0	0	0	0	0	0	0	0	0	0	1
SFV07	SFV	nov	2023	0	0	0	0	0	0	0	0	0	0	0	1	0	0	0	0	0	0	1
SFV08	SFV	nov	2023	0	0	0	0	0	0	0	0	0	0	0	1	0	0	0	0	0	0	1
SFV09	SFV	nov	2023	1	0	0	0	0	0	0	0	0	0	0	0	0	0	0	0	0	0	0
SFV10	SFV	nov	2023	0	0	0	0	0	0	0	0	0	0	0	0	0	0	0	0	0	0	1
SFV11	SFV	nov	2023	0	0	0	0	0	0	0	0	0	0	0	1	0	0	0	0	0	0	1
SFV12	SFV	nov	2023	0	0	0	0	0	0	0	0	0	0	0	1	0	0	0	0	0	0	1
SFV13	SFV	nov	2023	0	0	0	0	0	0	0	0	0	0	0	0	0	0	0	0	0	0	1
SFV14	SFV	nov	2023	0	0	0	0	0	0	0	0	0	0	0	1	0	0	0	0	0	0	1
SFV15	SFV	nov	2023	0	0	0	0	0	0	0	0	0	0	0	0	0	0	0	0	0	0	1
SFV16	SFV	nov	2023	1	0	0	0	0	0	0	0	0	0	0	1	0	1	0	0	0	0	1
SFV17	SFV	nov	2023	0	0	0	0	0	0	0	0	0	0	0	0	0	0	0	0	0	0	1
SFV18	SFV	nov	2023	0	0	0	0	0	0	0	0	0	0	0	0	0	0	0	0	0	0	1
SFV19	SFV	nov	2023	0	0	0	0	0	0	0	0	0	0	0	1	0	0	0	0	0	0	1
SFV20	SFV	nov	2023	0	0	0	0	0	0	0	0	0	0	0	0	0	0	0	0	0	0	1
SFV21	SFV	nov	2023	0	1	0	0	0	0	0	0	0	0	0	0	0	1	0	0	0	0	1
SFV22	SFV	nov	2023	1	1	0	0	0	0	0	0	0	0	0	1	0	1	0	0	0	0	0
SFV23	SFV	nov	2023	0	0	0	0	0	0	0	0	0	0	0	1	0	0	0	0	0	0	0
SFV24	SFV	nov	2023	1	0	0	0	0	0	0	0	0	0	0	1	0	1	0	0	0	0	1
SFV25	SFV	nov	2023	0	0	0	0	0	0	0	0	0	0	0	0	0	0	0	0	0	0	1
SFV26	SFV	nov	2023	1	1	0	0	0	0	0	0	0	0	0	1	0	1	0	0	0	0	1
SFV27	SFV	nov	2023	0	0	0	0	0	0	0	0	0	0	0	1	0	1	0	0	0	0	1
SFV28	SFV	nov	2023	1	1	0	0	0	0	0	0	0	0	0	1	0	1	0	0	0	0	1
SFV29	SFV	nov	2023	0	0	0	0	0	0	0	0	0	0	0	1	0	0	0	0	0	0	1
SFV30	SFV	nov	2023	0	0	0	0	0	0	0	0	0	0	0	0	0	0	0	0	0	0	0
RP01	RP	nov	2023	1	0	0	0	0	0	0	0	0	0	0	0	0	0	0	0	0	0	0
RP02	RP	nov	2023	1	0	0	0	0	0	0	0	0	0	0	0	0	0	0	0	0	0	1
RP03	RP	nov	2023	0	0	0	0	0	0	0	0	0	0	0	0	0	0	0	0	0	0	1
RP04	RP	nov	2023	0	0	0	0	0	0	0	0	0	0	0	0	0	0	0	0	0	0	1
RP05	RP	nov	2023	1	0	0	0	0	0	0	0	0	0	0	0	0	0	0	0	0	0	0
RP06	RP	nov	2023	1	0	0	0	0	0	0	0	0	0	0	0	0	0	0	0	0	0	0
RP07	RP	nov	2023	1	0	0	0	0	0	0	0	0	0	0	0	0	0	0	0	0	0	1
RP08	RP	nov	2023	1	0	0	0	0	0	0	0	0	0	0	0	0	0	0	0	0	0	0
RP09	RP	nov	2023	0	0	0	0	0	0	0	0	0	0	0	0	0	0	0	0	0	0	0
RP10	RP	nov	2023	0	0	0	0	0	0	0	0	0	0	0	0	0	0	0	0	0	0	1
RP11	RP	nov	2023	0	0	0	0	0	0	0	0	0	0	0	0	0	0	0	0	0	0	1
RP12	RP	nov	2023	0	0	0	0	0	0	0	0	0	0	0	0	0	0	0	0	0	0	1
RP13	RP	nov	2023	0	0	0	0	0	0	0	0	0	0	0	0	0	1	0	0	0	0	0
RP14	RP	nov	2023	0	0	0	0	0	0	0	0	0	0	0	0	0	0	0	0	0	0	1
RP15	RP	nov	2023	0	0	0	0	0	0	0	0	0	0	1	0	0	1	0	0	0	0	1
RP16	RP	nov	2023	0	0	0	0	0	0	0	0	0	0	0	0	0	0	0	0	0	0	1
RP17	RP	nov	2023	0	0	0	0	0	0	0	0	0	0	0	0	0	0	0	0	0	0	0
RP18	RP	nov	2023	0	0	0	0	0	0	0	0	0	0	0	0	0	0	0	0	0	0	1
RP19	RP	nov	2023	0	0	0	0	0	0	0	0	0	0	0	0	0	0	0	0	0	0	1
RP20	RP	nov	2023	0	0	0	0	0	0	0	0	0	0	0	0	0	0	0	0	0	0	0
RP21	RP	nov	2023	0	0	0	0	0	0	0	0	0	0	0	0	0	0	0	0	0	0	0
RP22	RP	nov	2023	0	0	0	0	0	0	0	0	0	0	0	0	0	0	0	0	0	0	0
RP23	RP	nov	2023	0	0	0	0	0	0	0	0	0	0	0	0	0	0	0	0	0	0	0
RP24	RP	nov	2023	0	0	0	0	0	0	0	0	0	0	0	0	0	1	0	0	0	0	0
RP25	RP	nov	2023	0	0	0	0	0	0	0	0	0	0	0	0	0	0	0	0	0	0	1
RP26	RP	nov	2023	0	0	0	0	0	0	0	0	0	0	0	0	0	0	0	0	0	0	1
RP27	RP	nov	2023	0	0	0	0	0	0	0	0	0	0	0	0	0	0	0	0	0	0	1
RP28	RP	nov	2023	0	0	0	0	0	0	0	0	0	0	0	0	0	0	0	0	0	0	1
PC01	PC	nov	2023	0	0	0	0	0	1	0	0	0	0	0	0	0	0	0	0	0	0	1
PC02	PC	nov	2023	0	0	0	0	0	0	0	0	0	0	0	0	0	0	0	0	0	0	1
PC03	PC	nov	2023	0	0	0	0	0	1	0	1	0	0	0	0	0	0	0	0	0	0	1
PC04	PC	nov	2023	0	0	0	0	0	1	0	0	0	0	0	0	0	0	0	0	0	0	1
PC05	PC	nov	2023	0	0	0	0	0	1	0	0	0	0	0	0	0	0	0	0	0	0	1
PC06	PC	nov	2023	0	0	0	0	0	1	0	0	0	0	0	0	0	1	0	0	0	0	1
PC07	PC	nov	2023	0	0	0	0	0	1	0	0	0	1	0	0	0	0	0	0	0	0	1
PC08	PC	nov	2023	0	0	0	0	0	1	0	0	0	0	0	0	0	0	0	0	0	0	1
PC09	PC	nov	2023	0	1	0	0	0	1	0	0	0	0	0	0	0	1	0	0	0	0	1
PC10	PC	nov	2023	0	0	0	0	0	0	0	0	0	0	0	0	0	1	0	0	0	0	1
PC11	PC	nov	2023	0	0	0	0	0	0	0	0	0	1	0	0	0	1	0	0	0	0	1
PC12	PC	nov	2023	0	0	0	0	0	1	0	0	0	1	0	0	0	0	0	0	0	0	0
PC13	PC	nov	2023	0	0	0	0	1	0	0	0	0	1	0	0	0	0	0	0	0	0	1
PC14	PC	nov	2023	0	0	0	0	0	0	0	0	0	1	0	0	0	0	0	0	0	0	1
PC15	PC	nov	2023	0	0	0	0	0	0	0	0	0	0	0	0	0	0	0	0	0	0	1
PC16	PC	nov	2023	0	0	0	0	0	0	0	0	0	0	0	0	0	0	0	0	0	0	1
PC17	PC	nov	2023	0	0	0	0	0	1	0	0	0	0	0	0	0	0	0	0	0	0	1
PC18	PC	nov	2023	0	0	0	0	0	1	0	0	0	1	0	0	0	0	0	0	0	0	1
PC19	PC	nov	2023	0	0	0	0	0	1	0	0	0	1	0	0	0	0	0	0	0	0	0
PC20	PC	nov	2023	0	0	0	0	0	1	0	0	0	0	0	0	0	0	0	0	0	0	1
PC21	PC	nov	2023	0	0	0	0	0	1	0	0	0	0	0	0	0	0	0	0	0	0	0
PC22	PC	nov	2023	0	0	0	0	0	1	0	0	0	0	0	0	0	0	0	0	0	0	0
PC23	PC	nov	2023	0	0	0	0	0	1	0	0	0	0	0	0	0	0	0	0	0	0	0
PC24	PC	nov	2023	0	0	0	0	0	1	0	0	0	0	0	0	0	0	0	0	0	0	0
PC25	PC	nov	2023	0	0	0	0	0	1	0	0	0	0	0	0	0	0	0	0	0	0	0
PC26	PC	nov	2023	0	0	0	0	0	1	0	0	0	0	0	0	0	0	0	0	0	0	0
PC27	PC	nov	2023	0	0	0	0	0	0	0	0	0	0	0	0	0	0	0	0	0	0	0
PC28	PC	nov	2023	0	0	0	0	0	0	0	0	0	0	0	0	0	0	0	0	0	0	0
PC29	PC	nov	2023	0	0	0	0	0	0	0	0	0	0	0	0	0	0	0	0	0	0	0
PC30	PC	nov	2023	0	0	0	0	0	1	0	0	0	0	0	0	0	0	0	0	0	0	1
RP01	RP	jul	2024	0	0	0	0	0	0	0	1	0	1	0	0	0	0	0	0	0	0	1
RP02	RP	jul	2024	0	1	0	0	1	1	0	0	0	1	0	0	0	0	0	0	0	0	1
RP03	RP	jul	2024	1	0	0	0	0	1	0	1	0	1	1	0	0	0	0	0	0	0	0
RP04	RP	jul	2024	0	0	0	0	0	1	0	0	0	1	0	0	0	0	0	0	0	0	1
RP05	RP	jul	2024	1	0	0	0	0	1	0	0	0	0	0	0	0	0	0	0	0	0	0
RP06	RP	jul	2024	1	0	0	0	0	1	0	0	0	0	0	0	0	0	0	0	0	0	0
RP07	RP	jul	2024	1	0	0	0	0	1	1	0	0	1	0	0	0	0	0	0	0	0	0
RP08	RP	jul	2024	0	0	0	0	0	1	0	0	0	0	0	0	0	0	0	0	0	0	1
RP09	RP	jul	2024	1	0	0	0	0	1	0	0	0	1	0	0	0	0	0	0	0	0	0
RP10	RP	jul	2024	0	1	0	0	0	1	0	0	0	1	0	0	0	0	0	0	0	0	1
RP11	RP	jul	2024	0	0	0	0	0	1	0	0	0	1	0	0	0	0	0	0	0	0	1
RP12	RP	jul	2024	0	0	0	0	0	1	0	0	0	1	0	0	0	1	0	0	0	0	1
RP13	RP	jul	2024	0	0	0	0	0	0	0	0	0	1	0	0	0	0	0	0	0	0	1
RP14	RP	jul	2024	0	0	0	0	0	0	0	0	0	0	0	0	0	1	0	0	0	0	1
RP15	RP	jul	2024	0	0	0	0	0	0	0	0	0	1	0	0	0	1	0	0	0	0	1
RP16	RP	jul	2024	0	0	0	0	0	0	0	0	0	0	0	0	0	1	0	0	0	0	1
RP17	RP	jul	2024	0	0	0	0	1	0	0	0	0	1	0	0	0	0	0	0	0	0	1
RP18	RP	jul	2024	0	0	0	0	0	1	0	0	0	0	0	0	0	0	0	0	0	0	1
RP19	RP	jul	2024	0	0	0	0	0	0	0	0	0	0	0	0	0	0	0	0	0	0	1
RP20	RP	jul	2024	0	0	0	0	0	0	0	0	0	0	0	0	0	0	0	0	0	0	1
RP21	RP	jul	2024	0	0	0	0	0	1	0	0	0	0	0	0	0	0	0	0	0	0	1
RP22	RP	jul	2024	0	0	0	0	1	1	0	0	0	1	0	0	0	0	0	0	0	0	1
RP23	RP	jul	2024	0	0	0	0	0	1	0	0	0	1	0	0	0	0	0	0	0	0	0
RP24	RP	jul	2024	0	0	0	0	0	1	0	0	0	0	0	0	0	1	0	0	0	0	1
RP25	RP	jul	2024	0	0	0	0	0	0	0	0	0	0	0	0	0	0	0	0	0	0	1
RP26	RP	jul	2024	0	0	0	0	0	0	0	0	0	0	0	0	0	0	0	0	0	0	1
RP27	RP	jul	2024	0	0	0	0	0	1	0	0	0	1	0	0	0	0	0	0	0	0	1
RP28	RP	jul	2024	0	0	0	0	0	1	0	0	0	1	0	0	0	0	0	0	0	0	1
PC01	PC	jul	2024	0	0	0	0	0	0	0	0	0	0	0	0	0	0	0	0	0	0	1
PC02	PC	jul	2024	0	0	0	0	0	0	0	0	0	0	0	0	0	0	0	0	0	0	1
PC03	PC	jul	2024	0	0	0	0	0	1	0	0	0	0	0	0	0	0	0	0	0	0	1
PC04	PC	jul	2024	0	0	0	0	0	1	0	0	0	0	0	0	0	0	0	0	0	0	1
PC05	PC	jul	2024	0	0	0	0	0	1	0	0	0	0	0	0	0	0	0	0	0	0	1
PC06	PC	jul	2024	0	0	0	0	0	1	0	0	0	0	0	0	0	1	0	0	0	0	1
PC07	PC	jul	2024	0	0	0	0	0	1	0	0	0	1	0	0	0	0	0	0	0	0	1
PC08	PC	jul	2024	0	0	0	0	0	1	0	0	0	0	0	0	0	0	0	0	0	0	1
PC09	PC	jul	2024	0	1	0	0	0	1	0	0	0	1	0	0	0	0	0	0	0	0	1
PC10	PC	jul	2024	0	0	0	0	0	0	0	0	0	0	0	0	0	0	0	0	0	0	1
PC11	PC	jul	2024	0	0	0	0	0	0	0	0	0	0	0	0	0	1	0	0	0	0	1
PC12	PC	jul	2024	0	0	0	0	0	0	0	0	0	0	0	0	0	0	0	0	0	0	0
PC13	PC	jul	2024	0	1	0	0	0	1	0	0	0	0	0	0	0	0	0	0	0	0	1
PC14	PC	jul	2024	0	0	0	0	0	0	0	0	0	1	0	0	0	0	0	0	0	0	1
PC15	PC	jul	2024	0	0	0	0	0	1	0	0	0	0	0	0	0	0	0	0	0	0	1
PC16	PC	jul	2024	0	0	0	0	0	1	0	0	0	1	0	0	0	0	0	0	0	0	1
PC17	PC	jul	2024	0	0	0	0	0	1	0	0	0	0	0	0	0	0	0	0	0	0	1
PC18	PC	jul	2024	0	0	0	0	0	0	0	0	0	1	0	0	0	0	0	0	0	0	1
PC19	PC	jul	2024	0	0	0	0	0	0	0	0	0	0	0	0	0	0	0	0	0	0	1
PC20	PC	jul	2024	0	0	0	0	0	0	0	0	0	0	0	0	0	0	0	0	0	0	1
PC21	PC	jul	2024	0	0	0	0	0	1	0	0	0	1	0	0	0	0	0	0	0	0	1
PC22	PC	jul	2024	0	0	0	0	0	1	0	0	0	1	0	0	0	0	0	0	0	0	0
PC23	PC	jul	2024	0	0	0	0	0	1	0	0	0	1	0	0	0	0	0	0	0	0	1
PC24	PC	jul	2024	0	0	0	0	0	1	0	0	0	0	0	0	0	0	0	0	0	0	0
PC25	PC	jul	2024	0	0	0	0	0	1	0	0	0	0	0	0	0	0	0	0	0	0	1
PC26	PC	jul	2024	0	0	0	0	0	1	0	0	0	0	0	0	0	0	0	0	0	0	1
PC27	PC	jul	2024	0	0	0	0	0	1	0	0	0	0	0	0	0	0	0	0	0	0	0
PC28	PC	jul	2024	0	0	0	0	0	1	0	0	0	1	0	0	0	0	0	0	0	0	0
PC29	PC	jul	2024	0	0	0	0	0	1	0	0	0	1	0	0	0	1	0	0	0	0	1
PC30	PC	jul	2024	0	0	0	1	0	1	0	0	0	0	0	0	0	0	0	0	0	0	1
SJ01	SJ	jul	2024	0	0	0	0	0	1	0	0	0	1	0	0	0	0	0	0	0	0	1
SJ02	SJ	jul	2024	0	1	0	0	0	1	0	0	0	1	0	0	0	0	0	0	0	0	0
SJ03	SJ	jul	2024	0	1	0	0	0	0	0	0	0	1	0	0	0	0	0	0	0	0	1
SJ04	SJ	jul	2024	0	0	0	0	0	1	0	0	0	1	0	0	0	0	0	0	0	0	1
SJ05	SJ	jul	2024	0	0	0	0	0	1	0	0	0	0	0	0	0	0	0	0	0	0	1
SJ06	SJ	jul	2024	0	0	0	0	0	1	0	0	0	0	1	0	0	0	0	0	0	0	0
SJ07	SJ	jul	2024	0	0	0	0	0	1	0	0	0	1	0	0	0	0	0	0	0	0	1
SJ08	SJ	jul	2024	0	0	0	0	0	1	0	0	0	1	0	0	0	0	0	0	0	0	1
SJ09	SJ	jul	2024	0	0	0	0	0	1	1	0	0	1	0	0	0	0	0	0	0	0	1
SJ10	SJ	jul	2024	0	0	0	0	0	1	0	0	0	1	0	0	0	0	0	1	0	0	1
SJ11	SJ	jul	2024	0	0	0	0	0	1	0	0	0	1	0	0	0	0	0	0	0	0	1
SJ12	SJ	jul	2024	0	0	0	0	0	1	0	0	0	0	0	0	0	0	0	0	0	0	1
SJ13	SJ	jul	2024	0	0	0	0	0	1	0	0	0	1	0	0	0	0	1	0	0	0	1
SJ14	SJ	jul	2024	0	0	0	0	0	1	0	0	0	0	0	0	0	0	0	0	0	0	1
SJ15	SJ	jul	2024	0	0	0	0	0	1	0	0	0	1	0	0	0	0	0	0	0	0	0
SJ16	SJ	jul	2024	0	0	0	0	0	1	0	0	0	1	0	0	0	0	0	0	0	0	1
SJ17	SJ	jul	2024	0	0	0	0	0	1	0	0	0	0	0	0	0	0	0	0	0	0	1
SJ18	SJ	jul	2024	0	0	0	0	0	1	0	0	0	1	0	0	0	1	0	0	0	0	1
SJ19	SJ	jul	2024	0	1	0	0	1	1	0	0	0	1	0	0	0	1	0	0	0	0	1
SJ20	SJ	jul	2024	0	0	0	0	0	1	0	0	0	0	0	0	0	0	0	0	0	0	1
SJ21	SJ	jul	2024	0	0	0	0	0	1	0	0	0	1	0	0	0	0	0	0	0	0	1
SJ22	SJ	jul	2024	0	0	0	0	0	1	0	0	0	1	0	0	0	0	0	0	0	0	1
SJ23	SJ	jul	2024	0	0	0	0	0	1	0	0	0	1	0	0	0	0	1	0	0	0	1
SJ24	SJ	jul	2024	0	0	0	0	0	1	0	0	0	1	0	0	0	0	0	0	0	0	0
SJ25	SJ	jul	2024	0	0	0	0	0	1	0	0	0	1	0	0	0	1	0	0	0	0	1
SJ26	SJ	jul	2024	0	0	0	0	0	1	0	0	0	1	0	0	0	0	0	0	0	0	1
SJ27	SJ	jul	2024	0	0	0	0	0	1	0	0	0	1	0	0	0	0	0	0	0	0	1
SJ28	SJ	jul	2024	0	0	0	0	0	1	0	0	0	1	0	0	0	0	1	0	0	0	1
SJ29	SJ	jul	2024	0	0	0	0	0	1	0	0	0	1	0	0	0	0	0	0	0	0	1
SJ30	SJ	jul	2024	0	0	1	0	0	1	1	0	0	0	1	1	0	0	0	0	0	0	1
SFV01	SFV	jul	2024	0	1	0	0	0	1	0	0	0	0	0	0	0	1	0	0	0	0	1
SFV02	SFV	jul	2024	0	1	1	0	0	1	0	0	0	0	0	0	0	1	0	0	0	0	1
SFV03	SFV	jul	2024	0	0	0	0	0	0	0	0	0	0	0	1	0	0	0	0	0	0	1
SFV04	SFV	jul	2024	0	0	0	0	1	0	0	0	0	0	0	1	0	0	0	0	0	0	1
SFV05	SFV	jul	2024	0	0	1	0	0	0	0	0	0	0	0	1	0	0	0	0	0	0	0
SFV06	SFV	jul	2024	0	1	1	0	0	1	0	1	0	0	0	1	0	0	0	0	0	0	0
SFV07	SFV	jul	2024	0	0	1	0	0	0	0	0	0	0	0	0	0	0	0	0	0	0	1
SFV08	SFV	jul	2024	0	0	0	0	0	0	0	0	1	0	0	1	0	1	0	0	0	0	1
SFV09	SFV	jul	2024	0	0	1	0	0	0	0	0	0	0	0	0	0	0	0	0	0	0	1
SFV10	SFV	jul	2024	0	0	0	0	0	0	0	0	0	0	0	0	0	0	0	1	0	0	1
SFV11	SFV	jul	2024	0	0	0	0	0	0	0	0	0	0	0	1	0	0	0	0	0	0	1
SFV12	SFV	jul	2024	0	0	0	0	0	0	0	0	0	0	0	1	0	0	0	0	0	0	1
SFV13	SFV	jul	2024	0	0	1	0	0	0	0	0	0	0	0	1	0	0	0	0	0	1	1
SFV14	SFV	jul	2024	0	0	0	0	0	0	0	0	0	0	0	1	0	0	0	0	0	0	1
SFV15	SFV	jul	2024	0	0	0	0	0	0	0	0	0	0	0	1	0	0	0	0	0	0	1
SFV16	SFV	jul	2024	0	1	0	0	0	0	0	0	0	0	0	0	0	1	0	0	0	0	1
SFV17	SFV	jul	2024	0	1	0	0	0	0	0	0	0	0	0	1	0	1	0	0	0	0	1
SFV18	SFV	jul	2024	1	1	1	0	0	1	0	0	0	0	0	0	0	1	0	0	0	0	1
SFV19	SFV	jul	2024	0	0	1	0	0	0	0	0	0	0	0	1	0	0	0	0	0	0	1
SFV20	SFV	jul	2024	0	0	0	0	0	0	0	0	0	0	0	0	0	0	0	0	0	0	1
SFV21	SFV	jul	2024	1	1	0	0	0	0	0	0	0	0	0	0	0	0	0	0	0	0	1
SFV22	SFV	jul	2024	0	0	0	0	0	0	0	0	0	0	0	1	0	1	0	0	0	0	1
SFV23	SFV	jul	2024	1	0	1	0	0	1	0	0	0	0	0	1	0	1	0	0	0	0	1
SFV24	SFV	jul	2024	1	1	1	0	0	0	0	0	0	0	0	0	0	1	0	0	0	0	0
SFV25	SFV	jul	2024	1	1	0	0	0	1	1	0	0	0	0	0	0	1	0	0	0	0	1
SFV26	SFV	jul	2024	1	1	0	0	0	1	1	0	0	0	1	1	0	1	0	0	0	0	1
SFV27	SFV	jul	2024	1	0	1	0	0	1	1	0	0	0	0	0	0	0	0	0	0	0	0
SFV28	SFV	jul	2024	0	0	1	0	0	1	0	0	0	0	0	1	0	1	0	0	0	0	0
SFV29	SFV	jul	2024	0	0	0	0	0	1	0	0	0	0	0	1	0	0	0	0	0	0	1
SFV30	SFV	jul	2024	1	0	1	0	0	1	0	0	0	0	0	0	0	0	0	0	0	0	1
AG01	AG	jul	2024	0	0	0	0	0	1	0	0	0	0	0	0	0	1	0	0	0	0	1
AG02	AG	jul	2024	0	1	1	0	0	0	0	0	0	0	0	1	0	1	0	0	0	0	1
AG03	AG	jul	2024	0	0	1	0	0	0	0	0	0	0	0	0	0	1	0	0	0	0	1
AG04	AG	jul	2024	0	0	0	0	0	1	0	0	1	0	0	1	0	1	0	0	0	0	1
AG05	AG	jul	2024	0	0	1	0	0	1	0	0	0	0	0	0	0	1	0	0	0	0	1
AG06	AG	jul	2024	0	0	1	0	0	0	0	0	0	0	0	1	0	1	0	0	0	0	1
AG07	AG	jul	2024	0	0	0	0	0	0	0	0	0	0	0	0	0	1	0	0	0	0	1
AG08	AG	jul	2024	0	0	1	0	0	1	0	0	0	0	1	0	0	1	0	0	0	0	1
AG09	AG	jul	2024	0	0	1	0	0	1	0	0	0	0	0	0	0	1	0	0	0	0	1
AG10	AG	jul	2024	0	0	1	0	0	0	0	0	0	0	0	0	0	1	0	0	0	0	1
AG19	AG	jul	2024	0	0	0	0	0	1	0	0	0	0	1	1	0	1	0	0	0	0	1
AG20	AG	jul	2024	0	0	1	0	0	0	0	0	0	0	0	1	0	1	0	0	0	0	1
AG21	AG	jul	2024	0	0	1	0	0	1	0	0	0	0	1	0	0	1	0	0	0	0	1
AG22	AG	jul	2024	0	0	0	0	0	1	0	0	0	0	0	0	0	1	0	0	0	0	1
AG23	AG	jul	2024	0	0	0	0	0	1	0	0	0	0	0	1	0	1	0	0	0	0	1
AG24	AG	jul	2024	0	1	1	0	0	1	0	0	0	0	0	1	0	1	0	0	0	0	1
AG25	AG	jul	2024	0	0	0	0	0	0	0	0	0	0	0	0	0	1	0	0	0	0	1
AG26	AG	jul	2024	0	0	1	0	0	0	0	0	0	0	0	0	0	1	0	0	0	0	1
OC14	OC	jul	2024	0	0	0	0	0	1	0	0	0	0	0	0	0	0	0	0	0	0	1
OC15	OC	jul	2024	0	1	0	0	0	1	0	0	0	0	0	0	0	0	0	0	0	0	1
OC16	OC	jul	2024	0	1	0	0	0	1	0	0	0	0	0	0	0	0	0	0	0	0	1
OC17	OC	jul	2024	1	0	0	0	0	0	0	0	0	0	0	0	0	0	0	0	0	0	1
OC18	OC	jul	2024	0	0	0	0	0	1	0	0	0	0	0	0	0	0	0	0	0	0	1
OC19	OC	jul	2024	0	0	0	0	0	1	0	0	0	0	0	0	0	0	0	0	0	0	0
OC20	OC	jul	2024	0	0	0	0	0	0	0	0	0	0	0	0	0	0	0	0	0	0	1
OC22	OC	jul	2024	0	0	0	0	0	1	0	0	0	0	0	0	0	0	0	0	0	0	1
OC23	OC	jul	2024	0	0	0	0	0	1	0	0	0	0	0	0	0	0	0	0	0	0	1
OC24	OC	jul	2024	0	0	0	0	0	0	0	0	0	0	0	0	0	1	0	0	0	0	1
OC25	OC	jul	2024	0	0	0	0	0	1	0	0	0	0	0	0	0	0	0	0	0	0	1
OC26	OC	jul	2024	0	0	0	0	0	1	0	0	0	0	0	0	0	0	0	0	0	0	1
OC27	OC	jul	2024	0	0	0	0	0	1	0	0	0	0	1	0	0	0	0	0	0	0	1
OC28	OC	jul	2024	0	0	0	0	0	1	0	0	0	0	0	0	0	0	0	0	0	0	1
OC30	OC	jul	2024	0	0	0	0	0	0	0	0	0	0	0	0	0	0	0	0	0	0	1
SFF01	SFF	jul	2024	0	1	0	0	0	1	0	0	0	0	0	0	0	0	0	0	0	0	1
SFF02	SFF	jul	2024	0	0	0	0	0	1	0	0	0	0	0	0	0	1	0	0	0	0	1
SFF03	SFF	jul	2024	0	1	1	0	0	1	0	0	0	0	0	0	0	1	0	0	0	0	1
SFF04	SFF	jul	2024	0	1	0	0	0	1	0	0	0	0	0	0	0	1	0	0	0	0	1
SFF05	SFF	jul	2024	0	1	0	0	0	1	0	0	0	0	0	0	0	1	0	0	0	0	1
SFF06	SFF	jul	2024	0	1	0	0	0	1	0	0	0	0	0	0	0	1	0	0	0	0	1
SFF07	SFF	jul	2024	0	1	0	0	0	1	0	0	0	0	0	0	0	1	0	0	0	0	1
SFF08	SFF	jul	2024	0	1	0	0	0	1	0	0	0	0	0	0	0	1	0	0	0	0	1
SFF09	SFF	jul	2024	0	0	0	0	0	0	0	0	0	0	0	0	0	1	0	0	0	0	1
SFF10	SFF	jul	2024	0	0	0	0	0	0	0	0	0	0	0	0	0	1	0	0	0	0	1
SFF11	SFF	jul	2024	0	0	1	0	0	0	0	0	0	0	0	0	0	0	0	0	0	0	1
SFF12	SFF	jul	2024	0	0	1	0	0	0	0	0	0	0	0	0	0	0	0	0	0	0	1
SFF13	SFF	jul	2024	0	0	1	0	0	1	0	0	0	0	1	0	0	1	0	0	0	0	1
SFF14	SFF	jul	2024	0	0	0	0	1	0	0	0	0	0	0	0	0	1	0	0	0	0	1
SFF15	SFF	jul	2024	0	0	0	0	0	0	0	0	0	0	0	0	0	1	0	0	0	0	1
SFF16	SFF	jul	2024	1	0	0	0	0	0	0	0	0	0	0	0	0	1	0	0	0	0	1
SFF17	SFF	jul	2024	0	0	0	0	0	1	0	0	0	0	0	0	0	0	0	0	0	0	1
SFF18	SFF	jul	2024	0	1	0	0	0	1	0	0	0	0	0	0	0	0	0	0	0	0	1
SFF19	SFF	jul	2024	0	0	0	0	0	1	0	0	0	0	0	0	0	1	0	0	0	0	1
SFF20	SFF	jul	2024	0	0	0	0	0	1	0	0	0	0	0	0	0	0	0	0	0	0	1
SFF21	SFF	jul	2024	0	1	0	0	0	1	0	0	0	0	0	0	0	0	0	0	0	0	1
SFF23	SFF	jul	2024	0	0	0	0	0	1	0	0	0	0	0	0	0	0	0	0	0	0	1
SFF24	SFF	jul	2024	0	0	0	0	0	1	0	0	0	0	0	0	0	0	0	0	0	0	1
SFF25	SFF	jul	2024	0	0	0	0	0	1	0	0	0	0	0	0	0	0	0	0	0	0	1
SFF26	SFF	jul	2024	0	1	0	0	0	1	0	0	0	0	0	0	0	0	0	0	0	0	1
SFF27	SFF	jul	2024	0	1	0	0	0	1	0	0	0	0	0	0	0	0	0	0	0	0	1
SFF28	SFF	jul	2024	0	1	0	0	0	1	0	0	0	0	0	0	0	0	0	0	0	0	1
SFF29	SFF	jul	2024	0	1	0	0	0	1	0	0	0	0	0	0	0	1	0	0	0	0	1
SFF30	SFF	jul	2024	0	1	0	0	0	1	0	0	0	0	0	0	0	1	0	0	0	0	1
SV01	SV	jul	2024	0	0	0	0	0	1	0	0	0	0	0	0	0	0	0	0	0	0	1
SV02	SV	jul	2024	0	0	0	0	0	0	0	0	0	0	0	0	0	0	0	0	0	0	0
SV03	SV	jul	2024	0	1	0	0	0	1	0	0	0	0	0	0	0	1	0	0	0	0	1
SV04	SV	jul	2024	0	0	0	0	0	1	0	0	0	0	0	0	0	0	0	0	0	0	1
SV05	SV	jul	2024	0	0	0	0	0	1	0	0	0	0	0	0	0	0	0	0	0	0	1
SV06	SV	jul	2024	0	0	0	0	0	1	0	0	0	0	0	0	0	0	0	0	0	0	1
SV07	SV	jul	2024	0	0	0	0	0	1	0	0	0	0	0	0	0	0	0	0	0	0	1
SV08	SV	jul	2024	1	0	1	0	0	1	0	0	0	0	0	0	0	0	0	0	0	0	1
SV09	SV	jul	2024	0	0	1	0	0	0	0	0	0	0	0	0	0	0	0	0	0	0	1
SV10	SV	jul	2024	0	0	0	0	0	1	0	0	0	0	0	0	0	0	0	0	0	0	1
SV11	SV	jul	2024	0	0	0	0	0	1	0	0	0	0	0	0	0	0	0	0	0	0	1
SV12	SV	jul	2024	0	0	0	0	0	1	0	0	0	0	0	0	0	0	0	0	0	0	1
SV13	SV	jul	2024	0	0	0	0	0	1	0	0	0	0	0	0	0	0	0	0	0	0	1
SV14	SV	jul	2024	0	0	0	0	0	1	0	0	0	0	0	0	0	0	0	0	0	0	1
SV15	SV	jul	2024	0	0	0	0	0	1	0	0	0	0	0	0	0	0	0	0	0	0	1
SV15	SV	jul	2024	0	0	0	0	0	1	0	0	0	0	0	0	0	0	0	0	0	0	1
SV16	SV	jul	2024	0	0	0	0	0	0	0	0	0	0	0	0	0	0	0	0	0	0	1
SV17	SV	jul	2024	0	0	0	0	0	1	0	0	0	0	0	0	0	1	0	0	0	0	1
SV18	SV	jul	2024	0	0	0	0	0	1	0	0	0	0	0	0	0	0	0	0	0	0	1
SV19	SV	jul	2024	0	0	0	0	1	1	0	0	0	0	0	0	0	0	0	0	0	0	1
SV20	SV	jul	2024	0	0	0	0	0	1	0	0	0	0	0	0	0	0	0	0	0	0	1
SV21	SV	jul	2024	0	0	0	0	0	1	0	0	0	0	0	0	0	1	0	0	0	0	1
SV22	SV	jul	2024	0	0	0	0	0	1	0	0	0	0	0	0	0	0	0	0	0	0	1
SV24	SV	jul	2024	0	0	0	0	0	1	0	0	0	0	0	0	0	0	0	0	0	0	1
SV25	SV	jul	2024	0	0	0	0	0	1	0	0	0	0	0	0	0	0	0	0	0	0	1
SV26	SV	jul	2024	0	0	0	0	0	1	0	0	0	0	0	0	0	0	0	0	0	0	1
SV27	SV	jul	2024	0	0	0	0	0	1	0	0	0	0	0	0	0	0	0	0	0	0	1
SV29	SV	jul	2024	0	0	0	0	0	1	0	0	0	0	0	0	0	0	0	0	0	0	1
SV30	SV	jul	2024	0	0	0	0	0	1	0	0	0	0	0	0	0	0	0	0	0	0	1

## Sheet: occurrences
species	family	occurrences
Urochloa arrecta	Poaceae	658
Hymenachne pernambucensis	Poaceae	482
Persicaria ferrugineum	Polygonaceae	383
Eclipta prostata	Asteraceae	175
Leersia hexandra	Poaceae	170
Althernantera philoxeroides	Amaranthaceae	163
Paspalum repens	Poaceae	158
Caperonia castaneifolia	Euphorbiaceae	148
Cyperus blepharoleptos	Cyperaceae	133
Eichhornia azurea	Pontederiaceae	106
Polygonum acuminatum	Polygonaceae	71
Hymenachne amplexicaulis	Poaceae	57
Ipomoea cairica	Convolvulaceae	36
Ipomoea carnea	Convolvulaceae	34
Ludwigia leptocarpa	Onagraceae	33
Ipomoea subrevoluta	Convolvulaceae	23
Persicaria stelligera	Poygonaceae	7
Persicaria maculosa	Polygonaceae	3
Rynchospora corymbosa	Cyperaceae	1
Typha domingensis	Typhaceae	1
